# Supplementary material for: Profiling of the TCRβ repertoire in non-model species using high-throughput sequencing
Source: PubMed Central journal article supplement (PMC6072738; doi:10.1038/s41598-018-30037-0), 2018-08-02
Supplement: 41598_2018_30037_MOESM1_ESM.pdf [file 41598_2018_30037_MOESM1_ESM.pdf]

## **Supplementary Information for:**

**Title: Profiling of the TCR $\beta$  repertoire in non-model species using high-throughput sequencing.**

<sup>1\*</sup>Magdalena Migalska, <sup>1,2</sup>Alvaro Sebastian, <sup>1</sup>Jacek Radwan

<sup>1</sup>Evolutionary Biology Group, Faculty of Biology, Adam Mickiewicz University, ul. Umultowska 89, 61-614 Poznan, Poland (<http://evobiolab.biol.amu.edu.pl>)

<sup>2</sup>Instituto Aragonés de Empleo (INAEM), c/ Royo Villanova 1, 50007 Zaragoza, Spain

\*To whom correspondence should be addressed. Email: [magdalena.migalska@amu.edu.pl](mailto:magdalena.migalska@amu.edu.pl)

### **The file contains:**

**Supplementary Figures S1-S10**

**Supplementary Tables S1-S7**

**Supplementary Files S1-S3:**

**File S1** – Molecular protocol for T-cell receptor cDNA library preparation by 5'RACE for deep HTS profiling.

**File S2** – Partial, consensus sequences of the bank vole J genes identified in this study.

**File S3** – Partial, consensus sequences of the bank vole V genes identified in this study.

## Supplementary Figures

**Supplementary Figure S1. Schematic representation of the 5' RACE procedure for library construction.** In the first step, the mRNA of TCR $\beta$  chains is reverse transcribed with a primer matching the 5' end of the constant region of a TCR, and a universal adaptor is added at the 5' end of the cDNA. For quantitative analysis, the universal adaptor is modified to contain a unique molecular identifier (UMI). cDNA is amplified with one primer pair: the forward primer matching universal adaptor sequence is added to the 5' end during reverse transcription, and the reverse primer is in the constant region. Forward and reverse primers used in 5' RACE are represented as black arrows; RACE 5' adaptor as a grey bar; modified RACE 5' adaptor as a grey bar with a multi-coloured box representing UMI; and the sequence covered by Illumina sequencing as a thick, grey arrow. Location of the CDR3 region is shaded in grey.

# Genomic segments of TCRβ:

Leading peptide  
  Variable  
  Diversity  
  Joining  
  Constant

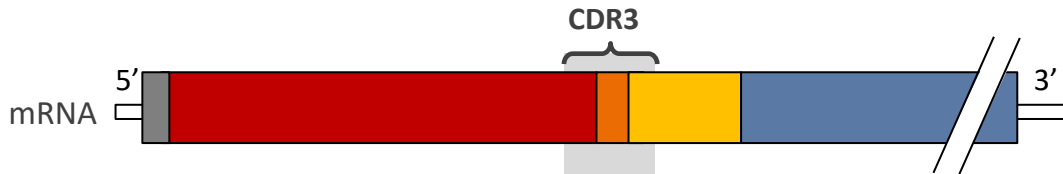

## Qualitative analysis

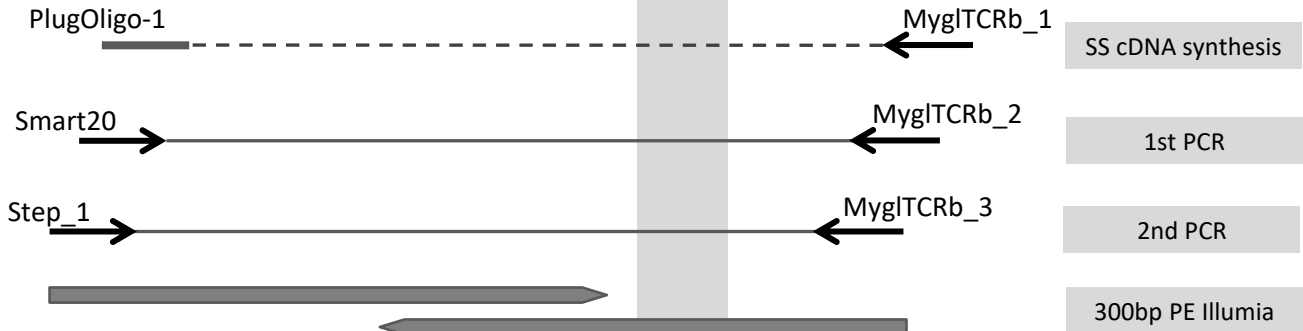

## Quantitative analysis

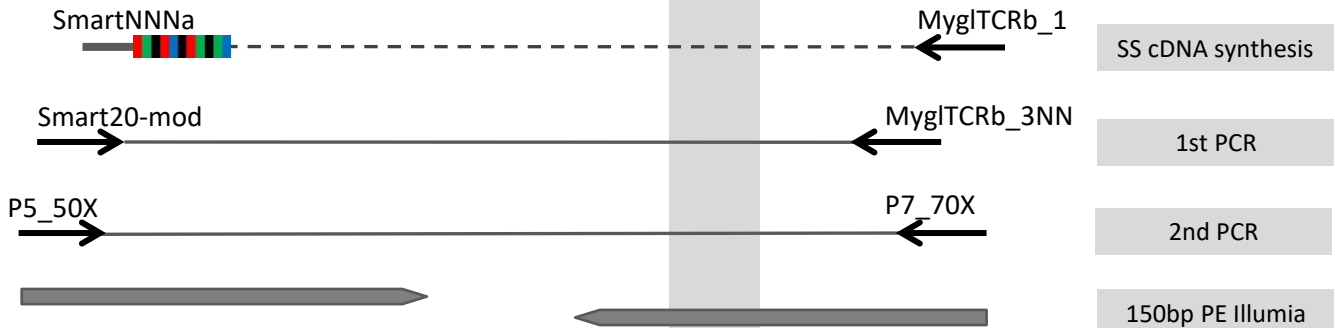

**Supplementary Figure S2. Neighbour-joining phylogenetic tree of 17 nucleotide sequences of bank vole TCR $\beta$  J alleles retrieved in the present study and the mouse reference.** An analogical tree was used to name the bank vole alleles, with numbering corresponding to murine orthologues. Bootstrap values based on 1000 replicates are shown. Branch lengths are in units of evolutionary distances (the number of base substitutions per site). The full list of mouse reference sequences with accession numbers is available in Supplementary Table S1, sequences of bank vole genes identified in this study are available in Supplementary File S2. Orange circles mark the mouse reference sequences; red circles denote murine sequence in an open reading frame but with alterations in regulatory elements or splice sites (ORF); and blue circles mark the bank vole sequences. Numbers after asterisks refer to the allele name.

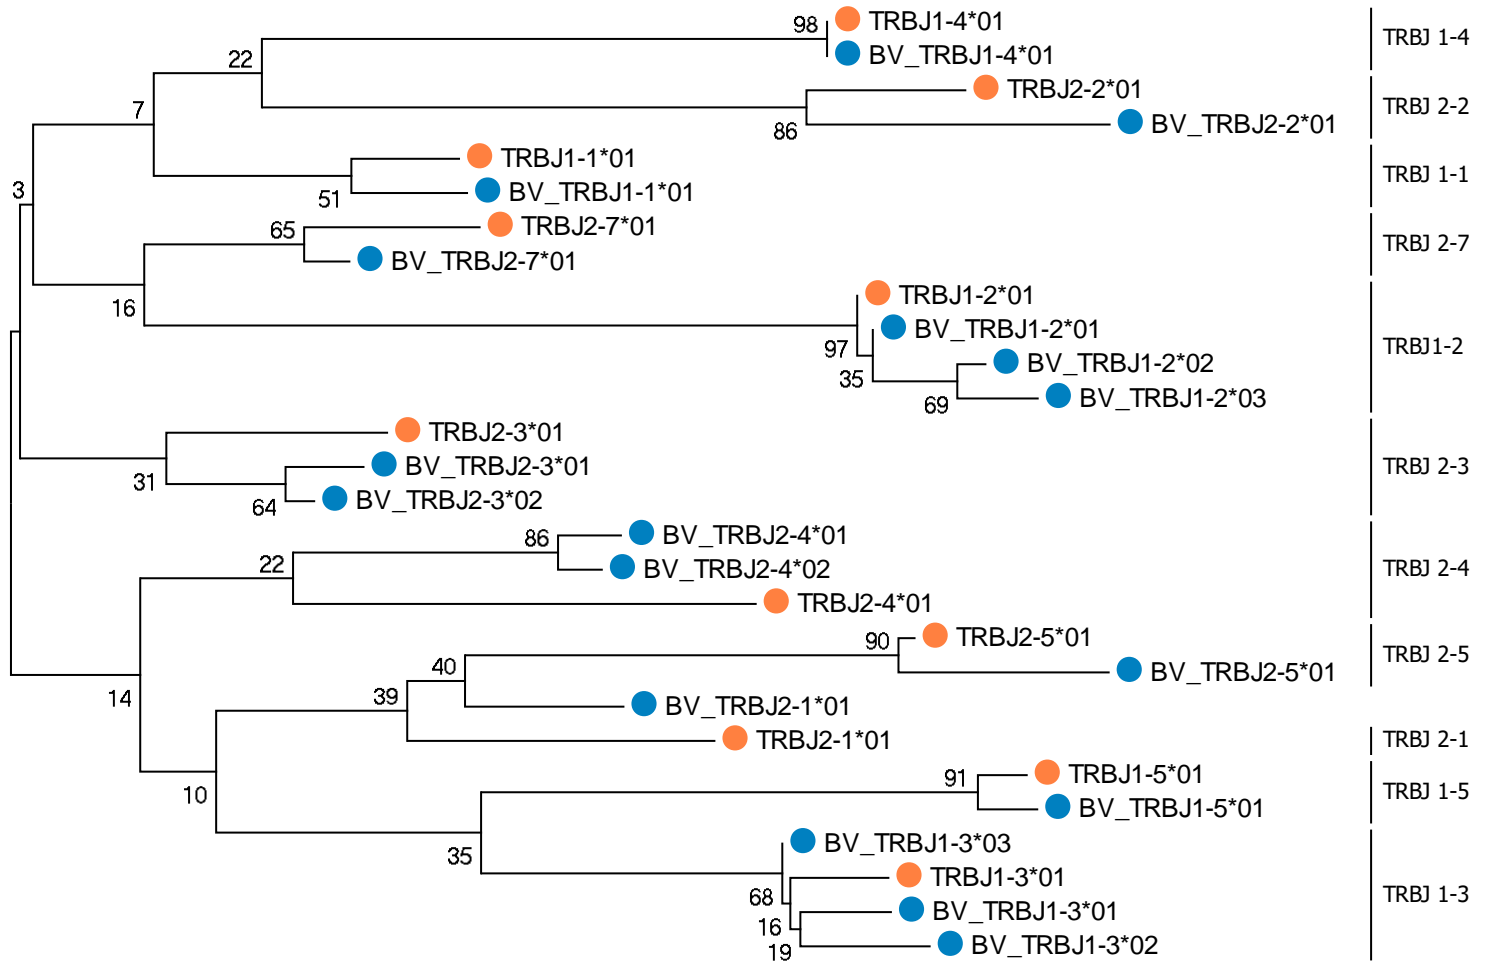

0.05

● bank vole TCRβ J genes

● murine functional TCRβ J genes

**Supplementary Figure S3. Neighbour-joining phylogenetic tree of 116 nucleotide sequences of bank vole TCR $\beta$  V alleles retrieved in the present study and the mouse reference.** An analogical tree was used to name the bank vole alleles with numbering corresponding to murine orthologues. Bootstrap values greater than 75, based on 1000 replicates, are shown. Branch lengths are in units of evolutionary distances (the number of base substitutions per site). A full list of mouse reference sequences with accession numbers is available in Supplementary Table S1; and sequences of bank vole genes identified in this study are available in Supplementary File S3. Orange circles mark the mouse reference sequences; red circles denote murine pseudogenes (P) or sequences in an open reading frame but with alterations in regulatory elements or splice sites (ORF); and blue circles mark the bank vole sequences. Number after asterisks refer to the allele name.

- bank vole TCR $\beta$  V genes
- murine functional TCR $\beta$  V genes
- murine TCR $\beta$  V pseudogenes and genes in an ORF but with alterations in regulatory elements or splice sites

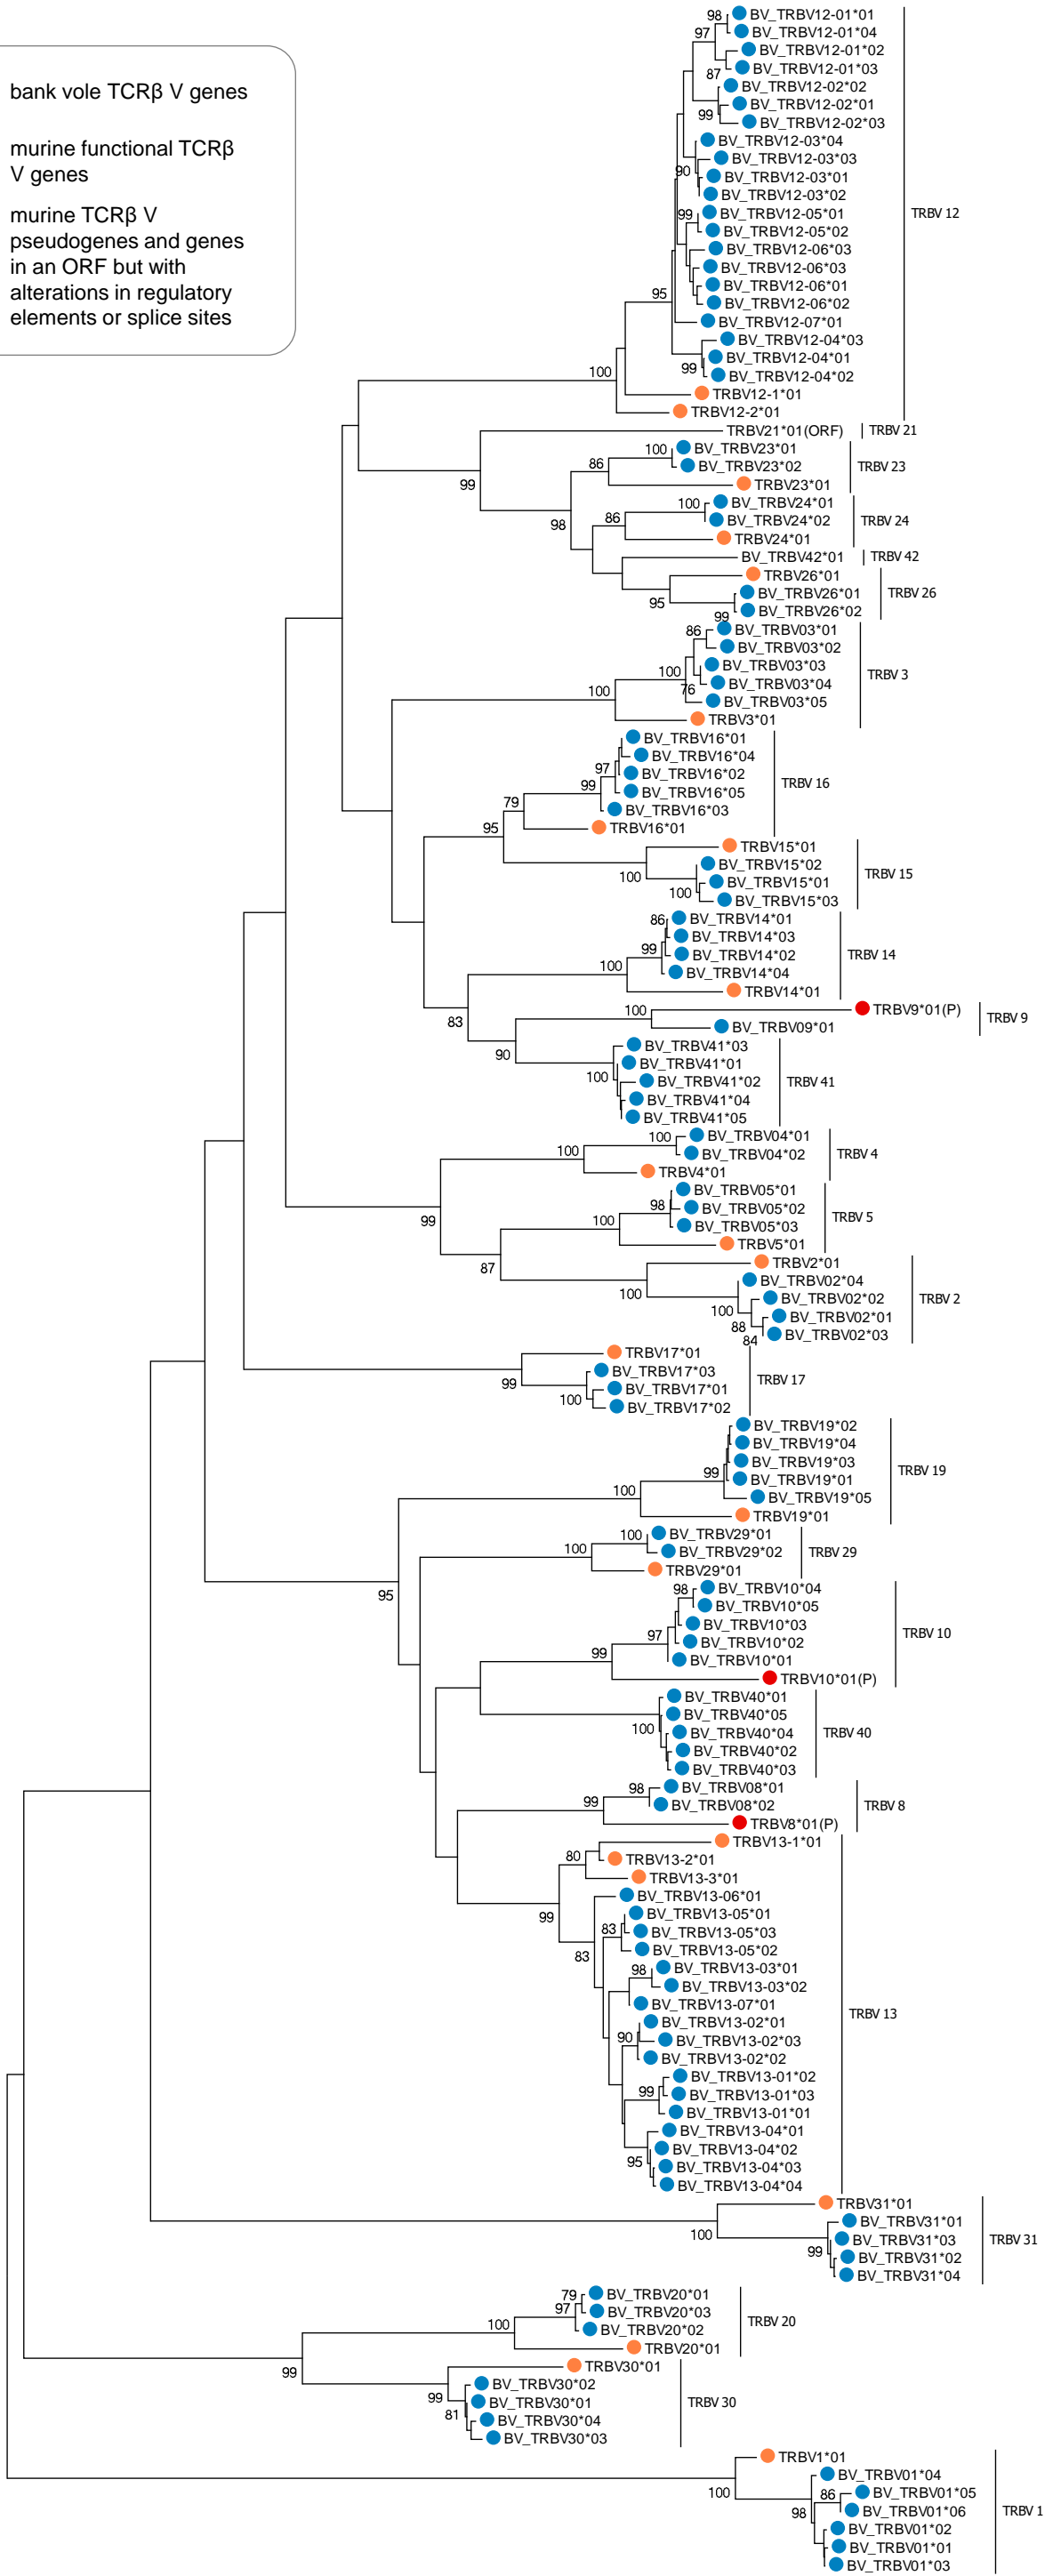

0.2



**Supplementary Figure S4. Presence of identified BV\_TRBJ alleles in seven analysed bank voles.** An allele present in a given individual is marked as a grey box.

| Gene and allele name | S1 | S2 | S3 | S4 | S5 | S6 | S7 |
|----------------------|----|----|----|----|----|----|----|
| BV_TRBJ1-1*01        | ■  | ■  | ■  | ■  | ■  | ■  | ■  |
| BV_TRBJ1-2*01        | ■  | ■  | ■  | ■  | ■  | ■  | ■  |
| BV_TRBJ1-2*02        | □  | ■  | □  | □  | ■  | □  | □  |
| BV_TRBJ1-2*03        | □  | □  | □  | □  | □  | ■  | □  |
| BV_TRBJ1-3*01        | ■  | ■  | □  | ■  | ■  | ■  | □  |
| BV_TRBJ1-3*02        | □  | ■  | ■  | □  | ■  | □  | □  |
| BV_TRBJ1-3*03        | □  | □  | □  | ■  | ■  | ■  | ■  |
| BV_TRBJ1-4*01        | ■  | ■  | ■  | ■  | ■  | ■  | ■  |
| BV_TRBJ1-5*01        | ■  | ■  | ■  | ■  | ■  | ■  | ■  |
| BV_TRBJ2-1*01        | ■  | ■  | ■  | ■  | ■  | ■  | ■  |
| BV_TRBJ2-2*01        | ■  | ■  | ■  | □  | ■  | ■  | □  |
| BV_TRBJ2-3*01        | ■  | ■  | ■  | ■  | ■  | ■  | ■  |
| BV_TRBJ2-3*02        | ■  | □  | □  | □  | □  | □  | □  |
| BV_TRBJ2-4*01        | ■  | □  | ■  | □  | □  | □  | □  |
| BV_TRBJ2-4*02        | □  | ■  | □  | ■  | ■  | ■  | ■  |
| BV_TRBJ2-5*01        | ■  | ■  | ■  | ■  | ■  | ■  | ■  |
| BV_TRBJ2-7*01        | ■  | ■  | ■  | ■  | ■  | ■  | ■  |

**Supplementary Figure S5. Presence of identified BV\_TRBV alleles in seven analysed bank voles.** Allele present in a given individual is marked as a grey box.

| Gene and allele name | S1 | S2 | S3 | S4 | S5 | S6 | S7 |
|----------------------|----|----|----|----|----|----|----|
| BV_TCRBV01*01        | ■  |    |    | ■  |    |    |    |
| BV_TCRBV01*02        |    | ■  | ■  |    |    |    |    |
| BV_TCRBV01*03        |    |    |    |    | ■  | ■  |    |
| BV_TCRBV01*04        |    |    |    |    |    | ■  |    |
| BV_TCRBV01*05        |    |    | ■  | ■  |    |    |    |
| BV_TCRBV01*06        |    |    |    |    |    |    | ■  |
| BV_TCRBV02*01        | ■  | ■  | ■  | ■  |    |    |    |
| BV_TCRBV02*02        |    | ■  | ■  |    |    | ■  |    |
| BV_TCRBV02*03        |    |    |    | ■  |    |    |    |
| BV_TCRBV02*04        |    |    |    |    |    |    | ■  |
| BV_TCRBV03*01        |    |    | ■  | ■  |    |    |    |
| BV_TCRBV03*02        |    |    |    |    |    |    |    |
| BV_TCRBV03*03        |    |    |    | ■  |    |    |    |
| BV_TCRBV03*04        |    |    |    |    | ■  | ■  |    |
| BV_TCRBV03*05        |    |    |    |    |    |    | ■  |
| BV_TCRBV04*01        | ■  | ■  | ■  | ■  | ■  |    |    |
| BV_TCRBV04*02        |    |    |    | ■  | ■  |    |    |
| BV_TCRBV05*01        | ■  | ■  | ■  | ■  | ■  |    |    |
| BV_TCRBV05*02        |    |    |    | ■  |    |    |    |
| BV_TCRBV05*03        |    |    |    |    |    |    | ■  |
| BV_TCRBV08*01        | ■  | ■  | ■  | ■  | ■  |    |    |
| BV_TCRBV08*02        |    |    |    | ■  | ■  |    |    |
| BV_TCRBV09*01        | ■  | ■  | ■  | ■  | ■  |    |    |
| BV_TCRBV10*01        |    | ■  | ■  |    |    |    |    |
| BV_TCRBV10*02        |    |    |    |    |    | ■  |    |
| BV_TCRBV10*03        |    |    |    |    | ■  | ■  |    |
| BV_TCRBV10*04        |    |    |    |    |    |    | ■  |
| BV_TCRBV10*05        |    |    |    |    |    |    |    |
| BV_TCRBV12-01*01     | ■  | ■  | ■  | ■  | ■  |    |    |
| BV_TCRBV12-01*02     |    |    |    | ■  |    |    |    |
| BV_TCRBV12-01*03     |    |    |    |    |    |    | ■  |
| BV_TCRBV12-01*04     |    |    |    |    |    |    |    |
| BV_TCRBV12-02*01     | ■  | ■  | ■  | ■  | ■  |    |    |
| BV_TCRBV12-02*02     |    | ■  | ■  |    |    | ■  |    |
| BV_TCRBV12-02*03     |    |    |    |    | ■  |    |    |
| BV_TCRBV12-03*01     | ■  | ■  | ■  | ■  | ■  |    |    |
| BV_TCRBV12-03*02     |    | ■  | ■  |    |    |    |    |
| BV_TCRBV12-03*03     |    |    |    | ■  |    |    | ■  |
| BV_TCRBV12-03*04     |    |    |    |    | ■  |    |    |
| BV_TCRBV12-04*01     | ■  | ■  | ■  | ■  | ■  |    |    |
| BV_TCRBV12-04*02     |    |    |    | ■  |    |    |    |
| BV_TCRBV12-04*03     |    |    |    |    |    |    | ■  |
| BV_TCRBV12-05*01     | ■  | ■  | ■  | ■  | ■  |    |    |
| BV_TCRBV12-05*02     |    |    |    |    | ■  |    |    |
| BV_TCRBV12-06*01     | ■  | ■  | ■  | ■  | ■  |    |    |
| BV_TCRBV12-06*02     |    | ■  | ■  |    |    |    |    |
| BV_TCRBV12-06*03     |    |    |    | ■  |    |    | ■  |
| BV_TCRBV12-06*04     |    |    |    |    |    |    |    |
| BV_TCRBV12-07*01     | ■  | ■  | ■  | ■  | ■  |    |    |
| BV_TCRBV13-01*01     |    | ■  | ■  |    |    |    |    |
| BV_TCRBV13-01*02     |    |    |    | ■  |    |    |    |
| BV_TCRBV13-01*03     |    |    |    |    | ■  | ■  |    |
| BV_TCRBV13-02*01     | ■  | ■  | ■  | ■  | ■  |    |    |
| BV_TCRBV13-02*02     |    | ■  | ■  |    |    |    |    |
| BV_TCRBV13-02*03     |    |    |    |    |    |    | ■  |
| BV_TCRBV13-03*01     |    | ■  | ■  |    |    |    |    |
| BV_TCRBV13-03*02     |    |    |    |    | ■  | ■  |    |
| BV_TCRBV13-04*01     | ■  |    |    | ■  |    |    |    |

| Gene and allele names | S1 | S2 | S3 | S4 | S5 | S6 | S7 |
|-----------------------|----|----|----|----|----|----|----|
| BV_TCRBV13-04*02      |    | ■  | ■  |    |    |    |    |
| BV_TCRBV13-04*03      |    |    |    | ■  | ■  | ■  |    |
| BV_TCRBV13-04*04      |    |    |    |    |    | ■  |    |
| BV_TCRBV13-05*01      |    |    | ■  | ■  | ■  | ■  |    |
| BV_TCRBV13-05*02      |    |    |    | ■  |    |    |    |
| BV_TCRBV13-05*03      |    |    |    |    |    | ■  |    |
| BV_TCRBV13-06*01      | ■  | ■  | ■  | ■  |    |    |    |
| BV_TCRBV13-07*01      |    | ■  | ■  | ■  | ■  | ■  |    |
| BV_TCRBV14*01         |    | ■  | ■  | ■  | ■  | ■  |    |
| BV_TCRBV14*02         |    |    |    | ■  |    |    |    |
| BV_TCRBV14*03         |    |    |    |    |    | ■  |    |
| BV_TCRBV14*04         | ■  |    |    | ■  |    |    |    |
| BV_TCRBV15*01         | ■  | ■  | ■  | ■  | ■  | ■  |    |
| BV_TCRBV15*02         |    |    |    | ■  | ■  | ■  |    |
| BV_TCRBV15*03         |    |    |    |    |    | ■  |    |
| BV_TCRBV16*01         | ■  | ■  | ■  | ■  | ■  | ■  |    |
| BV_TCRBV16*02         |    | ■  | ■  |    |    |    |    |
| BV_TCRBV16*03         |    |    | ■  |    |    |    |    |
| BV_TCRBV16*04         |    |    |    |    | ■  | ■  |    |
| BV_TCRBV16*05         |    |    |    |    |    | ■  |    |
| BV_TCRBV17*01         | ■  | ■  | ■  | ■  | ■  | ■  |    |
| BV_TCRBV17*02         |    |    |    | ■  | ■  | ■  |    |
| BV_TCRBV17*03         |    |    |    |    |    | ■  |    |
| BV_TCRBV19*01         | ■  | ■  | ■  | ■  | ■  | ■  |    |
| BV_TCRBV19*02         |    | ■  | ■  |    |    |    |    |
| BV_TCRBV19*03         |    |    | ■  |    |    |    |    |
| BV_TCRBV19*04         |    |    |    | ■  | ■  | ■  |    |
| BV_TCRBV19*05         |    |    |    |    |    | ■  |    |
| BV_TCRBV20*01         | ■  | ■  | ■  | ■  | ■  | ■  |    |
| BV_TCRBV20*02         |    | ■  | ■  |    |    |    |    |
| BV_TCRBV20*03         |    |    | ■  |    |    |    |    |
| BV_TCRBV23*01         | ■  | ■  | ■  | ■  | ■  | ■  |    |
| BV_TCRBV23*02         |    |    |    |    |    |    |    |
| BV_TCRBV24*01         |    |    |    |    |    |    |    |
| BV_TCRBV24*02         |    |    |    |    |    |    |    |
| BV_TCRBV26*01         | ■  | ■  | ■  | ■  | ■  | ■  |    |
| BV_TCRBV26*02         |    |    |    |    |    |    |    |
| BV_TCRBV29*01         | ■  | ■  | ■  | ■  | ■  | ■  |    |
| BV_TCRBV29*02         |    | ■  | ■  |    |    |    |    |
| BV_TCRBV30*01         | ■  | ■  | ■  | ■  | ■  | ■  |    |
| BV_TCRBV30*02         |    |    | ■  |    |    |    |    |
| BV_TCRBV30*03         |    |    |    | ■  | ■  | ■  |    |
| BV_TCRBV30*04         |    |    |    |    |    | ■  |    |
| BV_TCRBV31*01         | ■  | ■  | ■  | ■  | ■  | ■  |    |
| BV_TCRBV31*02         |    | ■  | ■  |    |    |    |    |
| BV_TCRBV31*03         |    |    |    |    | ■  | ■  |    |
| BV_TCRBV31*04         |    |    |    |    |    | ■  |    |
| BV_TCRBV40*01         | ■  | ■  | ■  | ■  | ■  | ■  |    |
| BV_TCRBV40*02         |    | ■  | ■  |    |    |    |    |
| BV_TCRBV40*03         |    |    |    | ■  |    |    |    |
| BV_TCRBV40*04         |    |    |    |    | ■  | ■  |    |
| BV_TCRBV40*05         |    |    |    |    |    | ■  |    |
| BV_TCRBV41*01         | ■  | ■  | ■  | ■  | ■  | ■  |    |
| BV_TCRBV41*02         |    | ■  | ■  |    |    |    |    |
| BV_TCRBV41*03         |    |    | ■  |    |    |    |    |
| BV_TCRBV41*04         |    |    |    | ■  | ■  | ■  |    |
| BV_TCRBV41*05         |    |    |    |    |    | ■  |    |
| BV_TCRBV42*01         | ■  | ■  | ■  | ■  | ■  | ■  |    |

**Supplementary Figure S6. Phylogenetic tree of amino acid sequences of bank vole TCR $\beta$  V genes retrieved in the present study, bank vole TCR $\beta$  V genes automatically extracted from a WGA, and mouse reference TCR $\beta$  V sequences.** The evolutionary history was inferred using the neighbour-joining method. Bootstrap values greater than 50, based on 1000 replicates, are shown. Evolutionary distances were computed using the JTT matrix-based method and are in the units of the number of amino acid substitutions per site. Orange circles mark the mouse sequences (TRBVXX\*01); red circles indicate murine pseudogenes (P) or sequences in an open reading frame (ORF) but with alterations in regulatory elements or splice sites; blue circles mark the bank vole sequences (BV\_TRBVXX\*01); and green circles denote bank vole TCR $\beta$  V genes automatically extracted from a WGA. Red branches mark clades (subgroups) absent from the bank vole WGA, but represented in the genes retrieved in this study. A full list of mouse reference sequences with accession numbers is available in Supplementary Table S1; sequences of bank vole genes identified in this study are available in Supplementary File S1 and S2; and V genes extracted from WGA (GenBank assembly ID: LIPI000000000.1) are available in an online database, [Vgenerepertoire.org](http://Vgenerepertoire.org).

- bank vole TCRβ V genes
- bank vole TCRβ V genes automatically extracted from a WGA
- murine functional TCRβ V genes
- murine TCRβ V pseudogenes and genes in an ORF but with alterations in regulatory elements or splice sites

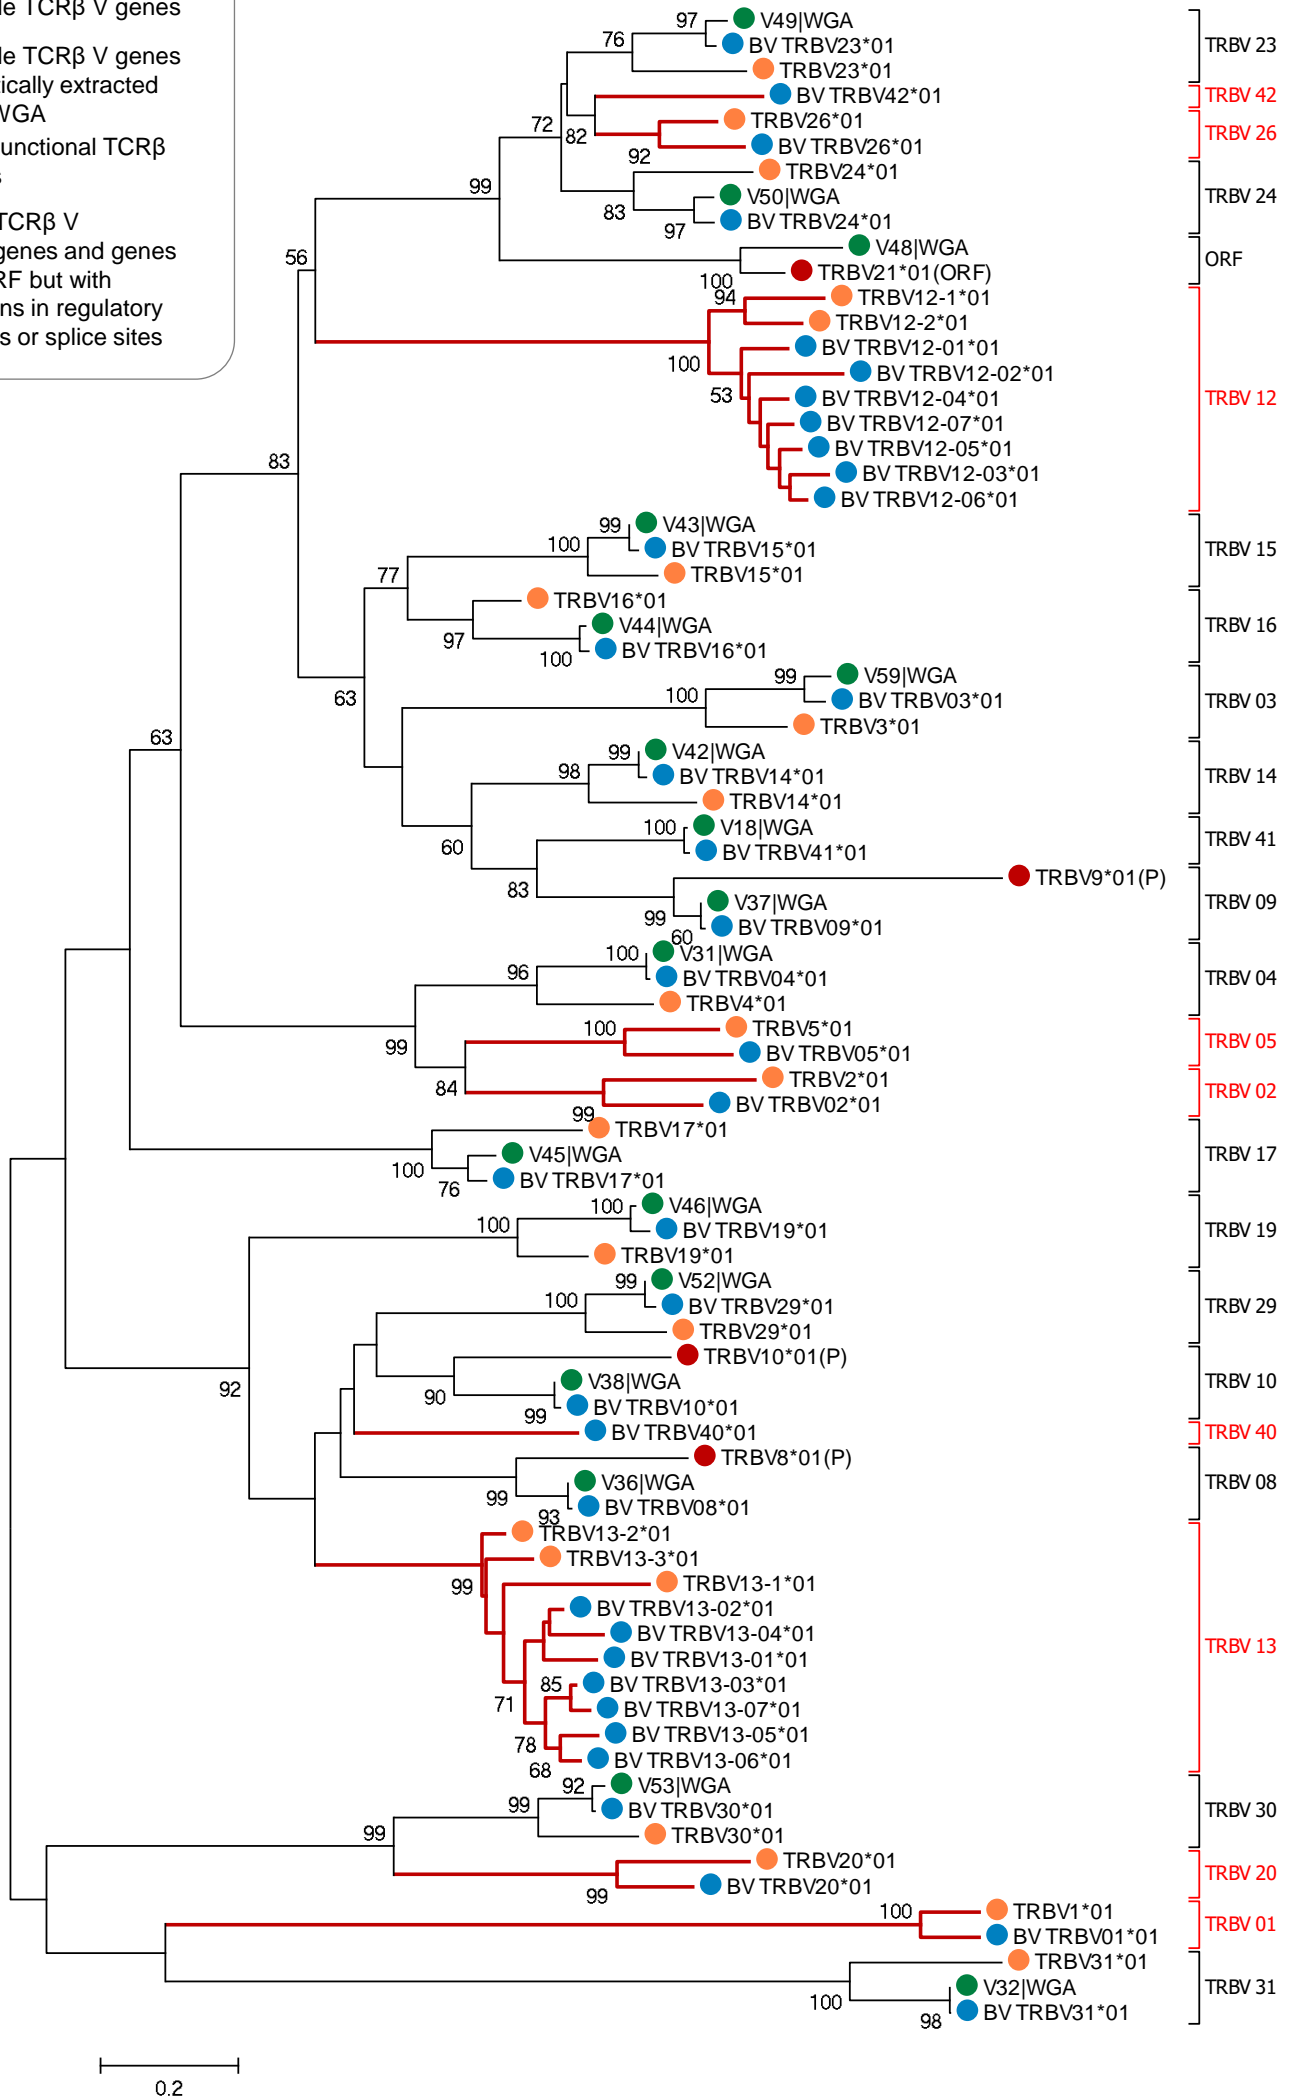

**Supplementary Figure S7. Differences in the TCR $\beta$  V–J segment pairing frequencies in all seven individuals (s01-s07).** Heatmap of frequencies of the CDR3 variants formed by the given V–J combinations.

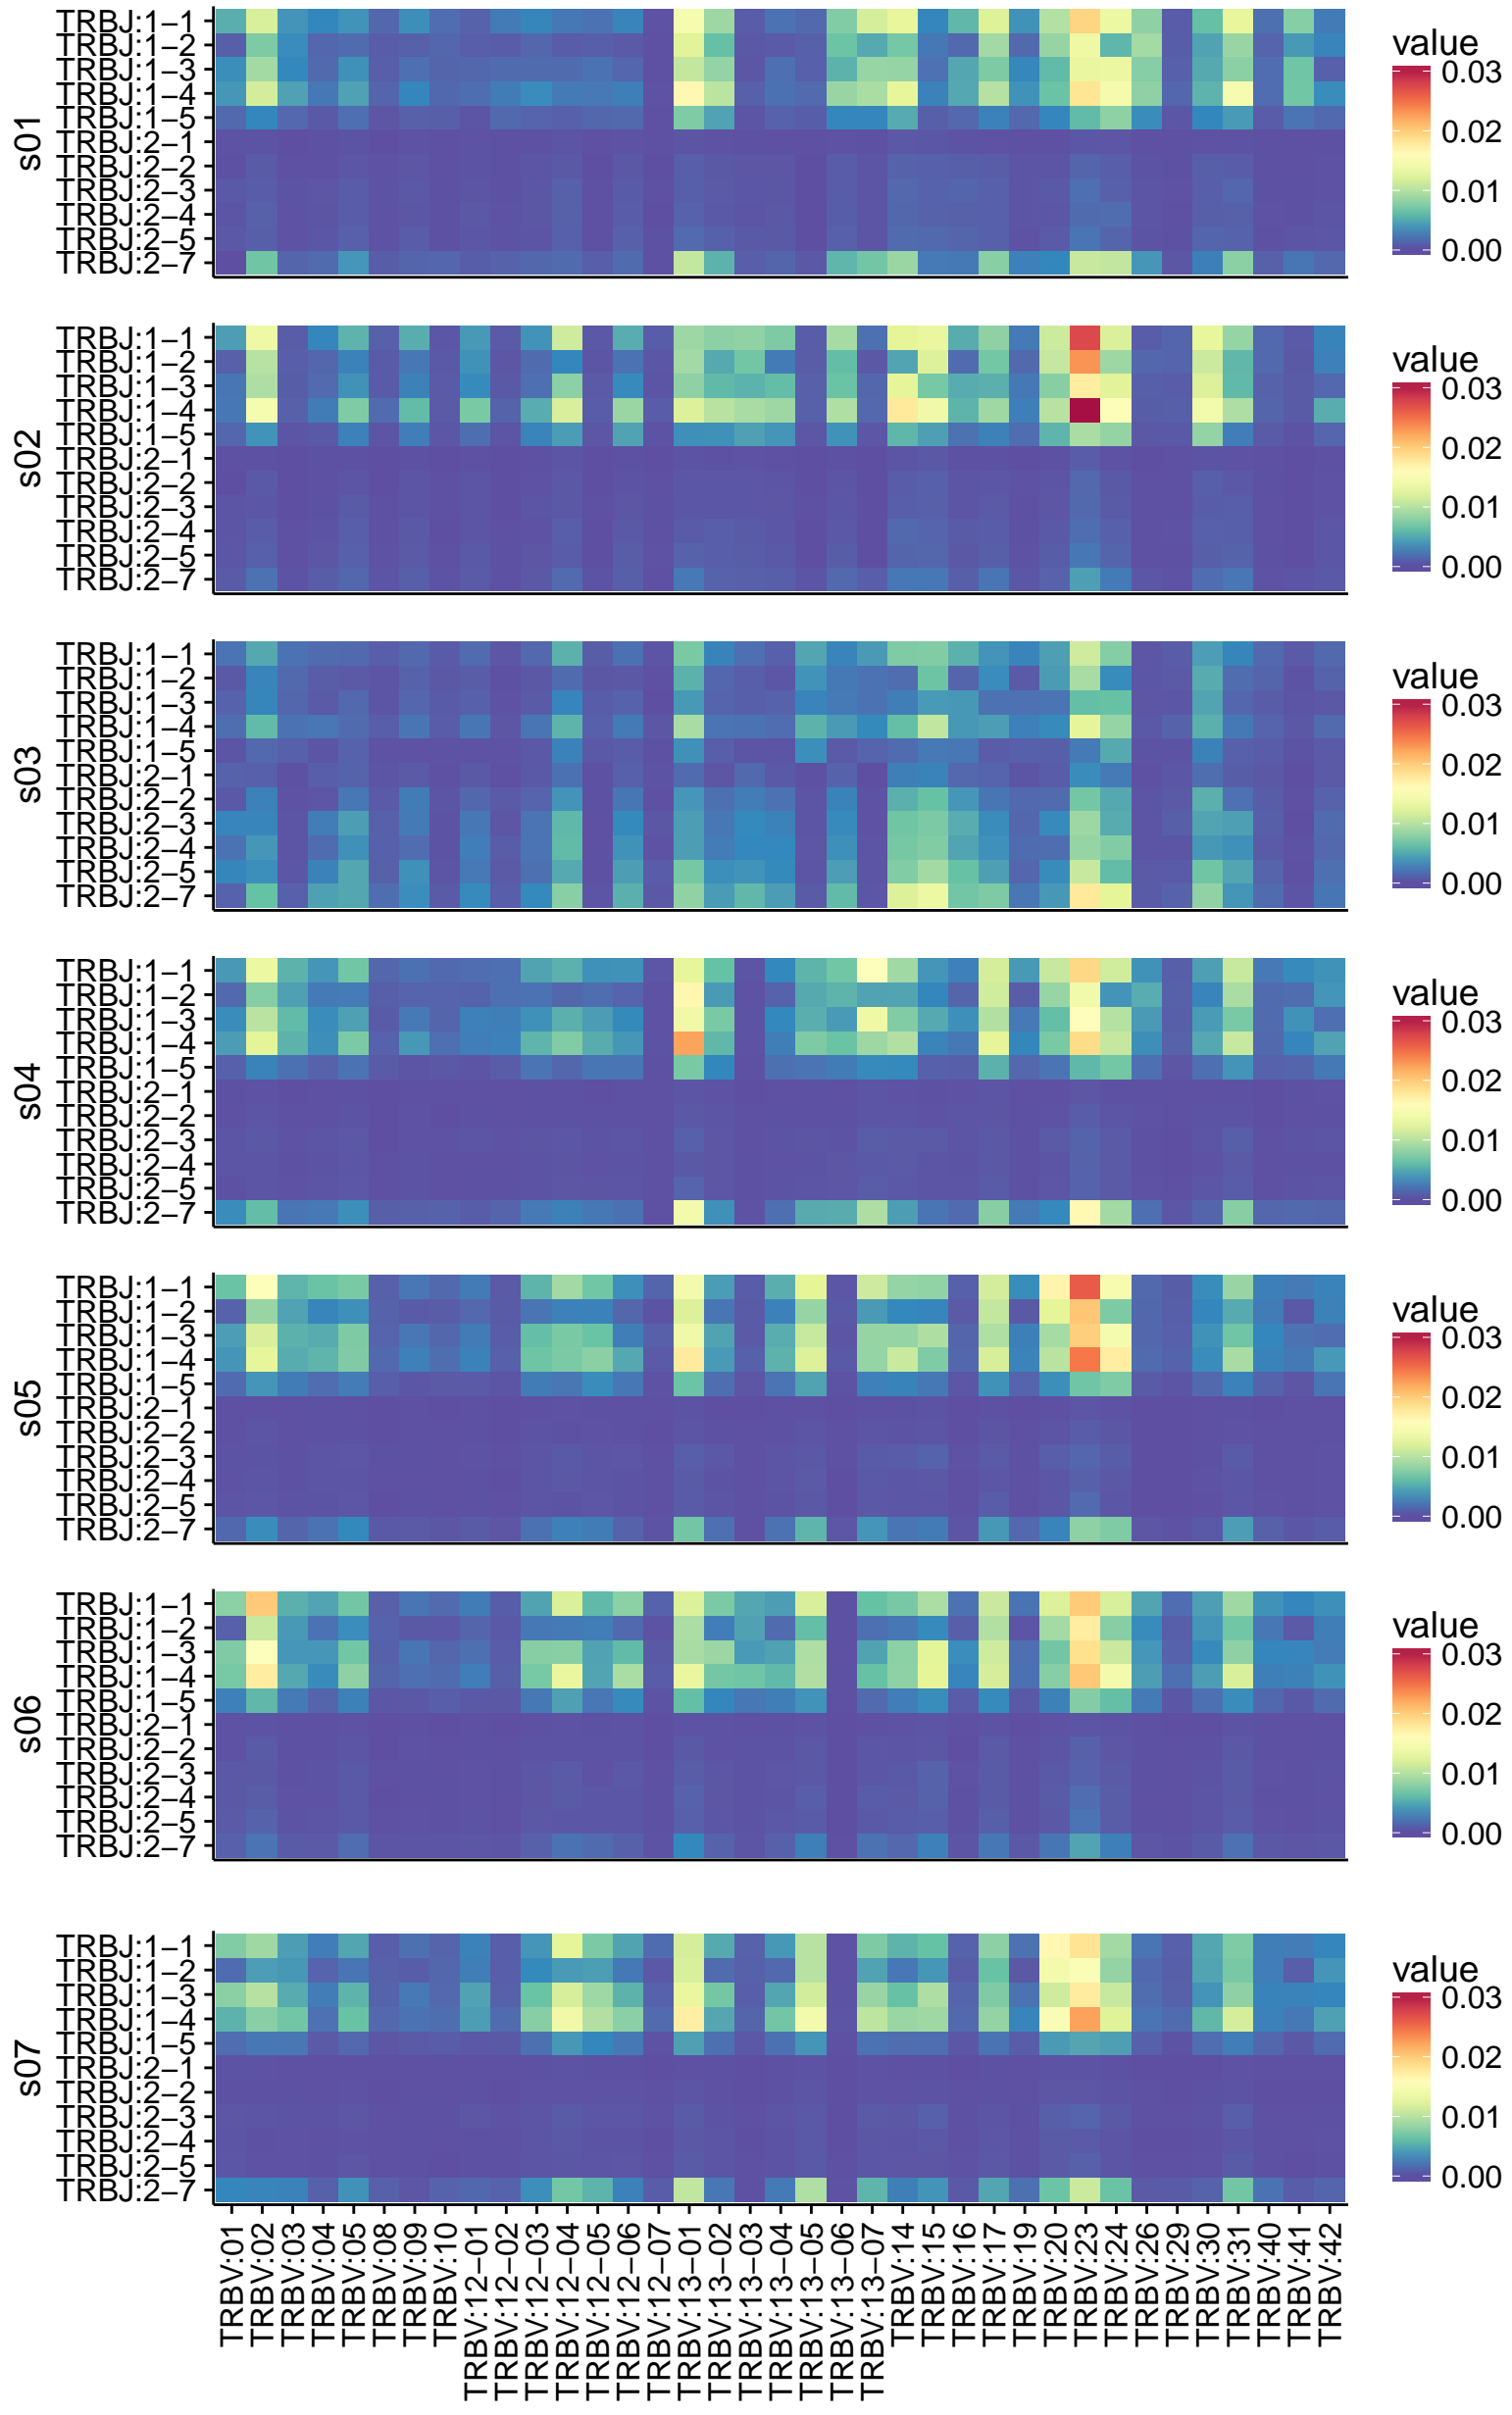



**Supplementary Figure S8. CDR3 *in silico* spectratyping.** CDR3 amino acid length distribution with bar stacks colour-coded according to the relative contribution of each TRBJ (a) and TRBV (b) gene.



**Supplementary Figure S9. Sharing of the unique CDR3 sequences.** Number of unique nucleotide (a) and amino acid (b) TCR $\beta$  CDR3 sequences shared among three individuals analysed in the quantitative part of the study.

a (nucleotide sequences)

b (amino acid sequences)

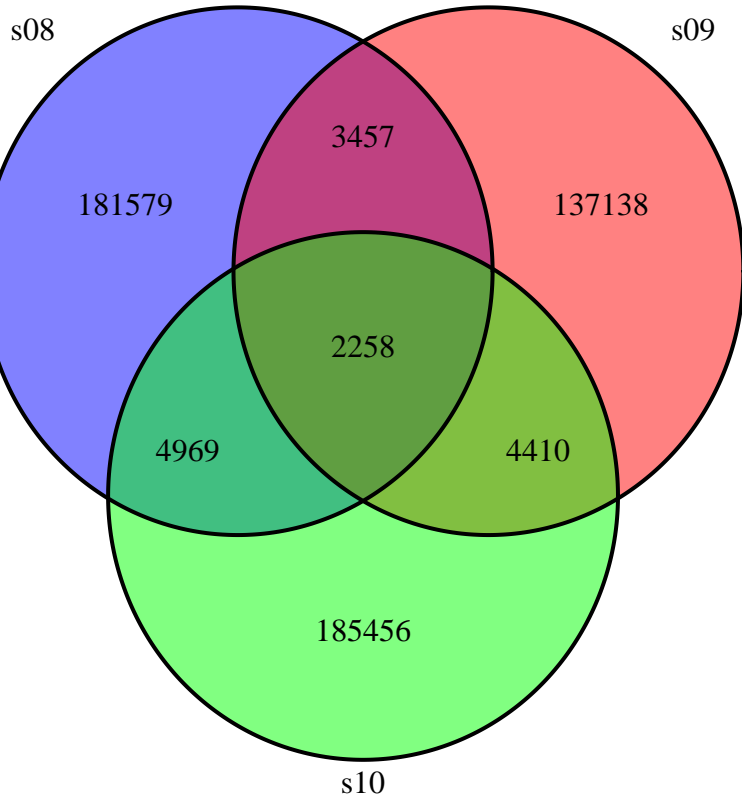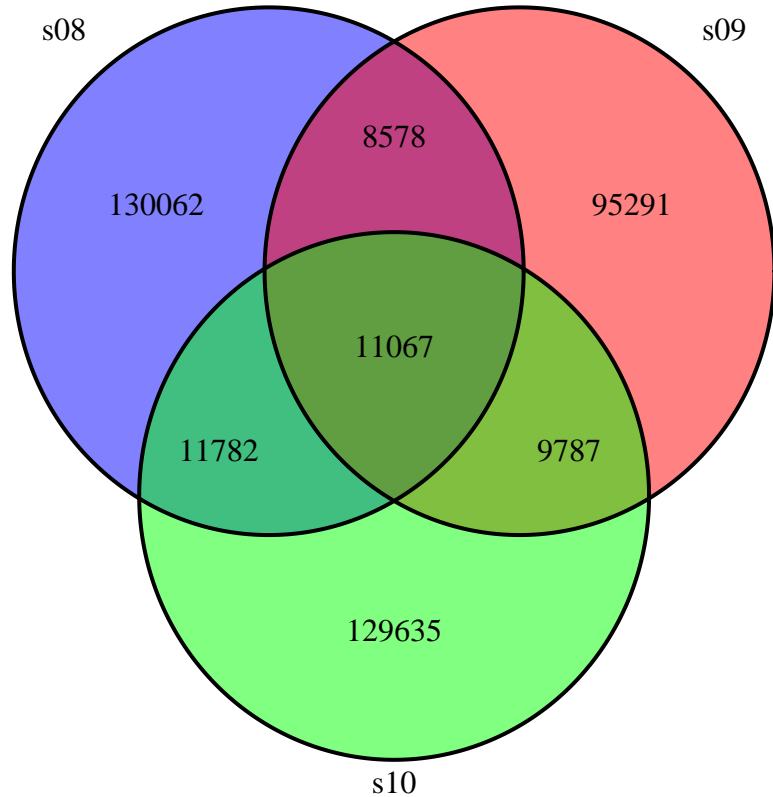

**Supplementary Figure S10. Rarefaction curve.** For each replicated amplicon (A–D) in three individuals (s08–s10), reads were subsampled at depths 0.25, 0.5, 0.75, 1, 1.5, 2, 2.5, 3, 3.5, and 4 mln and a number of retrieved, UMI-corrected, unique CDR3 variants was plotted.



## Supplementary Tables

**Supplementary Table S1. List of mouse reference sequences with accession numbers from IMGT® database.**

| Segment name | Gene and allele name | IMGT/LIGM-DB accession number | <i>Mus musculus</i> strain | Functionality | Start and end positions in the IMGT/LIGM-DB accession number | Number of nucleotides in the IMGT/LIGM-DB accession number | Start codon |
|--------------|----------------------|-------------------------------|----------------------------|---------------|--------------------------------------------------------------|------------------------------------------------------------|-------------|
| V (variable) | TRBV1*01             | AE000663                      | BALB/c                     | functional    | 13939--14225                                                 | 287 nt                                                     | 1           |
|              | TRBV2*01             | AE000663                      | BALB/c                     | functional    | 169947--170233                                               | 287 nt                                                     | 1           |
|              | TRBV3*01             | AE000663                      | BALB/c                     | functional    | 170773--171062                                               | 290 nt                                                     | 1           |
|              | TRBV4*01             | X56725                        | C57BL/6                    | functional    | 174--460                                                     | 287 nt                                                     | 1           |
|              | TRBV5*01             | AE000663                      | BALB/c                     | functional    | 184762--185045                                               | 284 nt                                                     | 1           |
|              | TRBV8*01             | AE000663                      | BALB/c                     | pseudogene    | 207058--207344                                               | 287 nt                                                     | 1           |
|              | TRBV9*01             | X16693                        | BALB/c                     | pseudogene    | 1--290                                                       | 290 nt                                                     | 1           |
|              | TRBV10*01            | X16694                        | BALB/c                     | pseudogene    | 1--289                                                       | 289 nt                                                     | 1           |
|              | TRBV12-1*01          | M15614                        | C57BL/6                    | functional    | 229--513                                                     | 285 nt                                                     | 1           |
|              | TRBV12-2*01          | M15613                        | C57BL/6                    | functional    | 235--519                                                     | 285 nt                                                     | 1           |
|              | TRBV13-1*01          | M15618                        | C57BL/6                    | functional    | 158--443                                                     | 286 nt                                                     | 1           |
|              | TRBV13-2*01          | M15617                        | C57BL/6                    | functional    | 160--445                                                     | 286 nt                                                     | 1           |
|              | TRBV13-3*01          | M15616                        | C57BL/6                    | functional    | 164--449                                                     | 286 nt                                                     | 1           |
|              | TRBV14*01            | AE000664                      | BALB/c                     | functional    | 7006--7294                                                   | 289 nt                                                     | 1           |
|              | TRBV15*01            | AE000664                      | BALB/c                     | functional    | 13044--13333                                                 | 290 nt                                                     | 1           |
|              | TRBV16*01            | L29434                        | C57BL/6                    | functional    | 844--1133                                                    | 290 nt                                                     | 1           |
|              | TRBV17*01            | AE000664                      | BALB/c                     | functional    | 34935--35221                                                 | 287 nt                                                     | 1           |
|              | TRBV19*01            | AE000664                      | BALB/c                     | functional    | 50425--50710                                                 | 286 nt                                                     | 1           |
|              | TRBV20*01            | AE000664                      | BALB/c                     | functional    | 60348--60640                                                 | 293 nt                                                     | 1           |
|              | TRBV21*01            | X16691                        | BALB/c                     | ORF           | 1--290                                                       | 290 nt                                                     | 1           |
|              | TRBV23*01            | AE000664                      | BALB/c                     | functional    | 87900--88192                                                 | 290 nt                                                     | 1           |
|              | TRBV24*01            | M61184                        | PWK                        | functional    | 178--467                                                     | 290 nt                                                     | 1           |
|              | TRBV26*01            | K02548                        | B10-A                      | functional    | 2--291                                                       | 290 nt                                                     | 1           |
|              | TRBV29*01            | AE000664                      | BALB/c                     | functional    | 143112--143398                                               | 287 nt                                                     | 1           |
| TRBV30*01    | X16695               | BALB/c                        | functional                 | 1--290        | 290 nt                                                       | 1                                                          |             |
| TRBV31*01    | X03277               | BALB/c                        | functional                 | 427--710      | 284 nt                                                       | 1                                                          |             |



J (joining)

|            |          |        |            |                |       |   |
|------------|----------|--------|------------|----------------|-------|---|
| TRBJ1-1*01 | X01018   | B10.A  | functional | 73..120        | 48 nt | 3 |
| TRBJ1-2*01 | X01018   | B10.A  | functional | 209..256       | 48 nt | 3 |
| TRBJ1-3*01 | X01018   | B10.A  | functional | 549..598       | 50 nt | 2 |
| TRBJ1-4*01 | X01018   | B10.A  | functional | 1036..1086     | 51 nt | 3 |
| TRBJ1-5*01 | AE000665 | BALB/c | functional | 155176..155225 | 50 nt | 2 |
| TRBJ1-6*01 | X01018   | B10.A  | ORF        | 1778..1830     | 53 nt | 2 |
| TRBJ2-1*01 | K02802   | B10.A  | functional | 405..454       | 50 nt | 2 |
| TRBJ2-2*01 | K02802   | B10.A  | functional | 608..658       | 51 nt | 3 |
| TRBJ2-3*01 | K02802   | B10.A  | functional | 874..922       | 49 nt | 1 |
| TRBJ2-4*01 | K02802   | B10.A  | functional | 1013..1061     | 49 nt | 1 |
| TRBJ2-5*01 | K02802   | B10.A  | functional | 1104..1152     | 49 nt | 1 |
| TRBJ2-7*01 | K02802   | B10.A  | functional | 1460..1506     | 47 nt | 2 |

**Supplementary Table S2. Quantitative analysis of the bank vole TCR $\beta$  repertoire.**

| <b>Sample</b> | <b>Raw reads</b> | <b>Pre-processed reads</b> | <b>Subsampled reads</b> | <b>Total CDR3s</b> | <b>Filtered CDR3s</b> | <b>UMI-corrected, unique CDR3 [nt]</b> | <b>Translated, unique CDR3s [aa]</b> |
|---------------|------------------|----------------------------|-------------------------|--------------------|-----------------------|----------------------------------------|--------------------------------------|
| s08_A         | 4 348 883        | 3 715 190                  | 1 500 000               | 1 444 126          | 1 027 504             | 135 523                                | 116 998                              |
| s08_B         | 3 921 528        | 3 328 499                  | 1 500 000               | 1 440 381          | 1 061 826             | 140 113                                | 120 997                              |
| s08_C         | 2 733 740        | 2 325 749                  | 1 500 000               | 1 436 925          | 1 051 260             | 140 900                                | 121 867                              |
| s08_D         | 3 213 527        | 2 721 862                  | 1 500 000               | 1 441 385          | 1 064 853             | 139 229                                | 120 339                              |
| s09_A         | 1 895 944        | 1 604 826                  | 1 500 000               | 1 459 126          | 1 125 212             | 112 995                                | 98 131                               |
| s09_B         | 1 834 330        | 1 562 509                  | 1 500 000               | 1 457 522          | 1 086 560             | 112 430                                | 97 443                               |
| s09_C         | 1 651 161        | 1 407 176                  | 1 407 176               | 1 368 393          | 1 058 349             | 111 239                                | 96 792                               |
| s09_D         | 1 526 104        | 1 292 617                  | 1 292 617               | 1 256 157          | 960 428               | 108 487                                | 94 479                               |
| s10_A         | 2 831 557        | 2 518 003                  | 1 500 000               | 1 341 979          | 869 573               | 132 567                                | 112 848                              |
| s10_B         | 3 836 747        | 3 429 632                  | 1 500 000               | 1 372 538          | 921 497               | 137 088                                | 116 557                              |
| s10_C         | 3 794 421        | 3 389 887                  | 1 500 000               | 1 374 509          | 901 547               | 136 551                                | 116 124                              |
| s10_D         | 2 208 357        | 1 942 147                  | 1 500 000               | 1 347 847          | 883 212               | 133 600                                | 113 825                              |
| <b>MEAN</b>   | 2 816 358        | 2 436 508                  | 1 474 983               | 1 395 074          | 1 000 985             | 128 394                                | 110 533                              |
| <b>SD</b>     | 954 650          | 841 339                    | 60 631                  | 59 405             | 84 680                | 12 353                                 | 10 130                               |

**Supplementary Table S3. Lower bound of the bank vole TCR repertoire size estimated with Chao2 estimator.**

| <b>Individual</b> | <b>q<sub>1</sub></b> | <b>q<sub>2</sub></b> | <b>q<sub>3</sub></b> | <b>q<sub>4</sub></b> | <b>S<sub>obs</sub></b> | <b>Chao2</b>   | <b>Sobs/Chao2</b> |
|-------------------|----------------------|----------------------|----------------------|----------------------|------------------------|----------------|-------------------|
| <b>S08</b>        | 45 115               | 23 649               | 30 126               | 93 373               | 192 263                | 224 538        | 85.6%             |
|                   | 23.5%                | 12.3%                | 15.7%                | 48.6%                |                        |                |                   |
| <b>s09</b>        | 30 183               | 15 862               | 21 600               | 79 618               | 147 263                | 168 801        | 87.2%             |
|                   | 20.5%                | 10.8%                | 14.7%                | 54.1%                |                        |                |                   |
| <b>s10</b>        | 49 978               | 29 203               | 40 586               | 77 416               | 197 183                | 229 258        | 86.0%             |
|                   | 25.3%                | 14.8%                | 20.6%                | 39.3%                |                        |                |                   |
| <b>mean</b>       | <b>41 759</b>        | <b>22 905</b>        | <b>30 771</b>        | <b>83 469</b>        | <b>178 903</b>         | <b>207 532</b> | <b>86.3%</b>      |
| mean%             | 23.1%                | 12.6%                | 17.0%                | 47.3%                |                        |                |                   |

**Legend:**

q<sub>1</sub> - number of CDR3 sequences present in only one replicate (amplicon)

q<sub>2</sub> - number of CDR3 sequences present in two replicates (amplicons)

q<sub>3</sub> - number of CDR3 sequences present in three replicates (amplicons)

q<sub>4</sub> - number of CDR3 sequences present in all four replicates (amplicons)

S<sub>obs</sub> - the total number of CDR3 unique sequences observed across all replicates for a given individual

Chao2 - non-parametric, incidence-based Chao2 estimator (Chao, 1987)

**Supplementary Table S4. Primers and adaptors used in 5' RACE (5'-3' orientation).**

| Stage                       | Name         | Usage     | Description                                                                                        | Sequence (5' → 3')                                                               | Source |
|-----------------------------|--------------|-----------|----------------------------------------------------------------------------------------------------|----------------------------------------------------------------------------------|--------|
| First strand cDNA synthesis | PlugOligo-1  | QL        | 5' template switch adapter (available with the kit)                                                | AAGCAGTGGTATCAACGCAGAGTA <b>CGCGGG</b>                                           | A      |
|                             | SmartNNNNa   | QN        | 5' template switch adapter with UMI (sequenced by Integrated DNA Technologies®)                    | AAGCAGUGGTAUCAACGCAGAGUNNNNUN<br>NNNUNNNNUCTT <b>rGrGrGrG</b>                    | B      |
|                             | MyglTCRb_1   | QL,<br>QN | Primer for cDNA synthesis, bank vole TCRβ mRNA constant region                                     | TGATCTCTGCTTCTGATG                                                               | C      |
| First PCR amplification     | Smart20      | QL        | Step – out primer, anneals to the Switch_oligo                                                     | <b>CACTCTATCCGACAAGCAGTGGTATCAACGCAG</b>                                         | D      |
|                             | MyglTCRb_2   | QL        | Nested primer for bank vole TCRβ constant region                                                   | GATGGCTCAAACAGGGTGACC                                                            | C      |
|                             | Smart20-mod  | QN        | Step-out primer carrying fragment of Illumina sequencing primer, anneals to SmartNNNNa             | <b>TCGTCGGCAGCGTCAGATGTGTATAAGAGACAG(N<sub>0.6</sub>)GTAAGCAGTGGTATCAACGCAG</b>  | E      |
|                             | MyglTCRb_3NN | QN        | Nested primer for bank vole TCRβ constant region carrying a fragment of Illumina sequencing primer | <b>GTCTCGTGGGCTCGGAGATGTGTATAAGAGACAG(N<sub>0.4</sub>)GGACTCACCTTGCTCAGATCCT</b> | E      |
| Second PCR amplification    | Step_1       | QL        | Step – out primer, anneals to the Smart 20                                                         | <b>CACTCTATCCGACAAGCAGT</b>                                                      | D      |
|                             | MyglTCRb_3   | QL        | Nested primer for bank vole TCRβ constant region                                                   | GGACTCACCTTGCTCAGATCCT                                                           | C      |
|                             | P5_50X       | QN        | Primer carrying Illumina P5 adaptor sequence and i5 index, anneals to the Smart20-mod              | <b>AATGATACGGCGACCACCGAGATCTACACX<br/>XXXXXTCGTCGGCAGCGTC</b>                    | E      |
|                             | P7-70X       | QN        | Primer carrying Illumina P7 adaptor sequence and i7 index, anneals to the MyglTCRb_3NN             | <b>CAAGCAGAAGACGGCATAACGAGATXXXXXX<br/>XGTCTCGTGGGCTCGG</b>                      | E      |

**Legend:**

U - deoxyuracil

rG - riboguanine

(N<sub>0.x</sub>) – random nucleotides introduced to diversify samples and promote better cluster identification on Illumina® instrument

XXXXXX – sample barcode corresponding to Nextera Index Kit indices (Illumina®)

Primer/adaptor sequence sources:

**A:** Sequence and name correspond to Mint-2 cDNA synthesis kit component, Cat # SK005 (Evrogen, Moscow, Russia)

**B:** Sequence and name correspond to Shugay *et al.* 2014

**C:** Primers designed in this study

**D:** Sequences and names correspond to Mamedov *et al.* 2013

**E:** Primers designed in this study with fragments of published Illumina® sequencing primers and/or adaptors

Usage (type of analysis):

**QL: Qualitative** description of the bank vole TCRβ repertoire - V and J segments identification and naming, V-J segment usage, CDR3 length distribution

**QN: Quantitative** analysis of the bank vole TCRβ repertoire - repertoire size estimation, private vs. public repertoire

**Supplementary Table S5. Experimental animals.**

| Individual | Sex | Age at death [days] | Analysis type            |
|------------|-----|---------------------|--------------------------|
|            |     |                     | Qualitative/Quantitative |
| S01        | F   | 120                 | QL                       |
| S02        | F   | 118                 | QL                       |
| S03        | M   | 118                 | QL                       |
| S04        | M   | 117                 | QL                       |
| S05        | M   | 117                 | QL                       |
| S06        | M   | 116                 | QL                       |
| S07        | M   | 112                 | QL                       |
| S08        | F   | 130                 | QN                       |
| S09        | F   | 126                 | QN                       |
| S10        | F   | 123                 | QN                       |

Supplementary Table S6. **Qualitative** description of the bank vole TCR $\beta$  repertoire.

| Individual  | Raw reads        | Pre-processed reads<br>(max 2 mln) | Total CDR3s    | Filtered<br>CDR3s | De-replicated<br>(unique) CDR3s | Singletons CDR3s | Translated CDR3s |
|-------------|------------------|------------------------------------|----------------|-------------------|---------------------------------|------------------|------------------|
| S01         | 2 874 831        | 1 735 702                          | 1 050 290      | 899 825           | 105 628                         | 72 032           | 85 541           |
| S02         | 2 958 342        | 1 830 763                          | 819 897        | 730 795           | 81 267                          | 54 002           | 65 655           |
| S03         | 2 562 446        | 1 584 306                          | 924 654        | 694 139           | 81 887                          | 47 850           | 67 526           |
| S04         | 3 252 316        | 1 946 828                          | 1 050 847      | 897 039           | 85 606                          | 58 657           | 68 344           |
| S05         | 2 756 794        | 1 718 934                          | 1 040 778      | 912 973           | 123 218                         | 74 113           | 97 205           |
| S06         | 3 104 526        | 1 849 465                          | 1 168 484      | 1 040 209         | 119 892                         | 78 807           | 94 989           |
| S07         | 2 850 275        | 1 767 252                          | 848 956        | 729 903           | 85 437                          | 54 758           | 69 480           |
| <b>Mean</b> | <b>2 908 504</b> | <b>1 776 179</b>                   | <b>986 272</b> | <b>843 555</b>    | <b>97 562</b>                   | <b>62 888</b>    | <b>78 391</b>    |
| <b>SD</b>   | <b>209 220</b>   | <b>106 423</b>                     | <b>116 357</b> | <b>118 004</b>    | <b>17 000</b>                   | <b>11 033</b>    | <b>12 768</b>    |
| <b>MIN</b>  | 2 562 446        | 1 584 306                          | 819 897        | 694 139           | 81 267                          | 47 850           | 65 655           |
| <b>MAX</b>  | 3 252 316        | 1 946 828                          | 1 168 484      | 1 040 209         | 123 218                         | 78 807           | 97 205           |

**Supplementary Table S7. Comparison of murine TCR $\beta$  repertoire basic statistics obtained with AmpliCDR3 and MIGEC/MiXCR.**

Basic data and diversity metrics for the CDR3 repertoires from PBMC of eight young (3-month-old) and eight old (23-month-old) C57BL/6J mice. The analysis was performed for a normalized dataset, down-sampled to 15 000 randomly chosen UMIs. HTS sequencing data used for this comparison was originally generated (NCBI BioProject: PRJNA341443) and analysed by Izraelson *et al.*, 2018. Results shown for MIGEC (Shugay *et al.*, 2014)/MiXCR (Bolotin *et al.*, 2015) analysis were taken from Supplementary Table S1 of Izraelson *et al.*, 2018.

| #Sample_ID | Observed diversity |           | Chao1   |           | Shannon-Wiener |           |
|------------|--------------------|-----------|---------|-----------|----------------|-----------|
|            | MIGEC              | AmpliCDR3 | MIGEC   | AmpliCDR3 | MIGEC          | AmpliCDR3 |
| old_1      | 5 303              | 5 299     | 12 561  | 12 981    | 1 403          | 1 355     |
| old_2      | 4 341              | 4 385     | 11 168  | 11 170    | 598            | 619       |
| old_3      | 3 050              | 3 135     | 12 342  | 14 217    | 46             | 48        |
| old_4      | 5 984              | 5 982     | 13 671  | 13 886    | 2 407          | 2 364     |
| old_6      | 6 279              | 6 419     | 13 929  | 14 433    | 1 934          | 2 028     |
| old_7      | 2 402              | 2 470     | 85 84   | 9 657     | 50             | 50        |
| old_8      | 4 322              | 4 537     | 10 334  | 10 652    | 761            | 865       |
| old_9      | 5 724              | 5 849     | 13 690  | 14 638    | 2 002          | 2 077     |
| young_1    | 10 792             | 10 977    | 82 754  | 87 961    | 5 720          | 5 899     |
| young_2    | 12 115             | 12 197    | 116 403 | 126 547   | 8 879          | 9 037     |
| young_3    | 13 467             | 13 502    | 131 194 | 132 922   | 12 292         | 12 304    |
| young_4    | 12 891             | 13 000    | 123 146 | 128 708   | 11 114         | 11 309    |
| young_5    | 12 236             | 12 315    | 128 455 | 137 610   | 9 044          | 9 097     |
| young_6    | 11 033             | 11 226    | 108 291 | 108 069   | 6 559          | 6 894     |
| young_7    | 13 046             | 13 073    | 142 580 | 138 039   | 11 079         | 11 155    |
| young_8    | 12 356             | 12 346    | 108 322 | 108 126   | 8 968          | 8 987     |

## References

- Bolotin DA, Poslavsky S, Mitrophanov I, Shugay M, Mamedov IZ, Putintseva E V, *et al.* (2015). MiXCR: software for comprehensive adaptive immunity profiling. *Nat Methods* **12**: 380–381.
- Chao A (1987). Estimating the population size for capture-recapture data with unequal catchability. *Biometrics* **43**: 783–791.
- Izraelson M, Nakonechnaya TO, Moltedo B, Egorov ES, Kasatskaya SA, Putintseva E V., *et al.* (2018). Comparative analysis of murine T-cell receptor repertoires. *Immunology* **153**: 133–144.
- Mamedov IZ, Britanova O V, Zvyagin I V, Turchaninova M a, Bolotin D a, Putintseva E V, *et al.* (2013). Preparing unbiased T-cell receptor and antibody cDNA libraries for the deep next generation sequencing profiling. *Front Immunol* **4**: 456.
- Shugay M, Britanova O V, Merzlyak EM, Turchaninova M a, Mamedov IZ, Tuganbaev TR, *et al.* (2014). Towards error-free profiling of immune repertoires. *Nat Methods* **11**: 653–5.



## Supplementary Files

## Protocol: T-cell receptor cDNA library preparation by 5'RACE for deep HTS profiling

The protocol was based on work of Mamedov et al. (2013)<sup>1</sup> and *User manual of Mint-2 cDNA synthesis kit (Evrogen)*. It was further modified to describe both ligation and primer extension method of adaptor addition.

- The sequences of the nested primers complementary to 3' ending of the constant region of the TCR will differ depending on I) species; II) receptor chain of interest. This protocol uses primers for the bank vole TCR $\beta$  chain, which should be substituted with appropriate primers when other species/chain are analysed.
- The protocol will have to be adjusted if another 5'RACE kit provider is chosen.
- A necessary step of amplicon library preparation for HTS is the addition of platform-specific sequencing adapters. Here, we present steps for either I) ligation, or II) two-step PCR-based primer extension method (with modified primers containing partial Illumina<sup>®</sup> adaptor sequences and indices). The latter method requires lower amounts of starting RNA and was proven to be equally accurate, but more efficient and less time-consuming<sup>2</sup> than ligation. However, especially with pooling of multiple samples, it requires synthesis of dozens of additional primers.
- The protocol is designed for the Illumina<sup>®</sup> paired-end sequencing. For better cluster differentiation during sequencing, spike the library with 15-20% of PhiX control library. 2×300bp sequencing will cover the entire Variable domain: whole V, D, J segments and the CDR3. It allows *de novo* description of the V and J segments and all qualitative and quantitative analysis. 2×150bp sequencing will cover entire J segment and CDR3, but only partially cover V segment. It is sufficient for detailed CDR3 analysis, but detailed characteristics of e.g. V-J usage can be compromised without thorough reference information for V segments.

### References:

1. Mamedov, I. Z. *et al.* Preparing unbiased T-cell receptor and antibody cDNA libraries for the deep next generation sequencing profiling. *Front. Immunol.* **4**, 456 (2013).
2. Menzel, U. *et al.* Comprehensive Evaluation and Optimization of Amplicon Library Preparation Methods for High-Throughput Antibody Sequencing. *PLoS One* **9**, e96727 (2014).
3. Shugay, M. *et al.* Towards error-free profiling of immune repertoires. *Nat. Methods* **11**, 653–5 (2014).

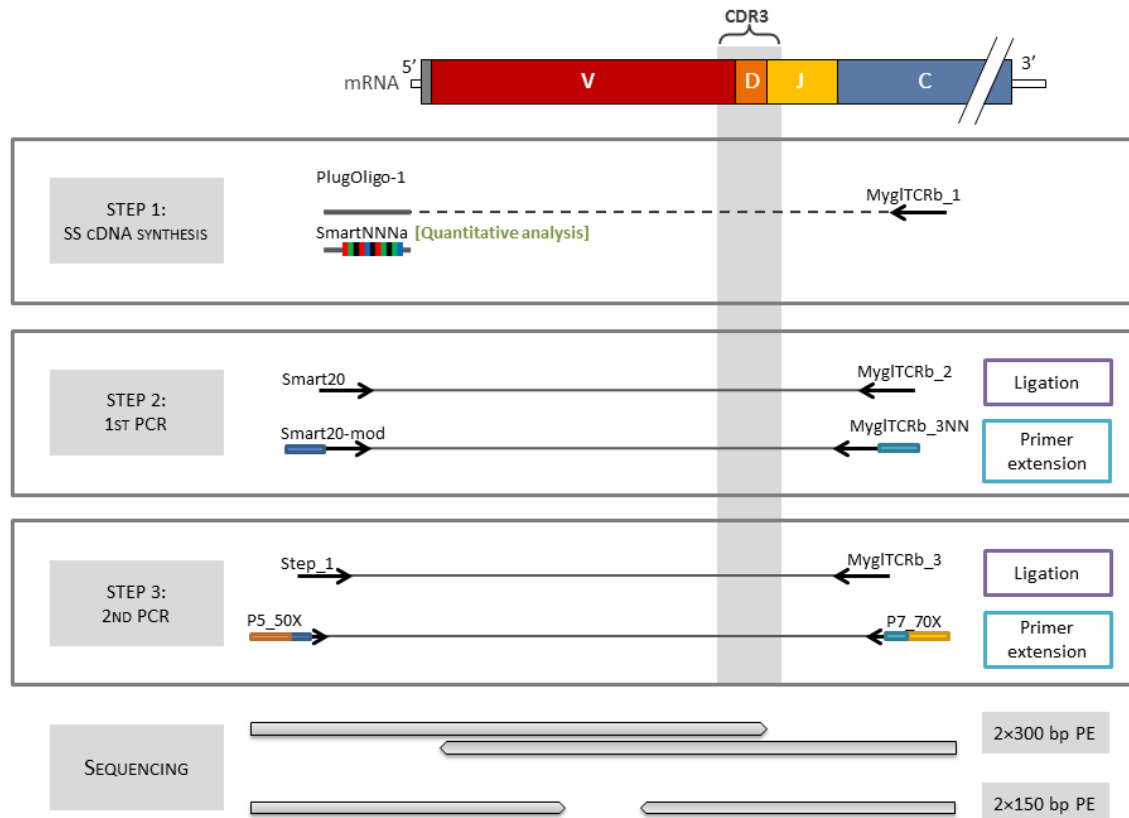

**Figure 1. Simplified overview of the library preparation protocol from RNA with 5'RACE for deep HTS profiling.** For details on primers and adaptors see Supplementary Table S4. Suggested sequencing method: Illumina, paired-end (PE) sequencing.

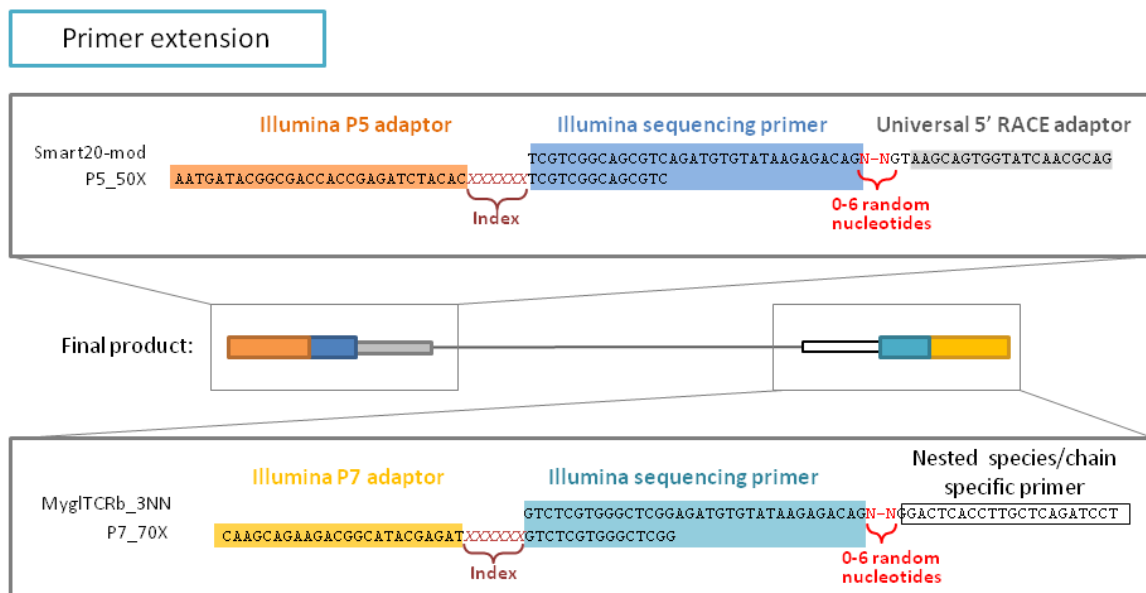

**Figure 2. Two-step primer extension method for library preparation.** Generation of full, functional Illumina adaptors through primer-extension. Random nucleotides (0-6) are added to introduce diversity at the beginning of the read and promote better cluster identification on Illumina instruments. All primer/adaptor sequences are in 5'→3' direction.

## Materials and reagents

- For primer/adaptor sequences see **Supplementary Table S4** of the original article.
- **Quantitative analysis with UMIs**: it is crucial to synthesize **SmartNNNa<sup>3</sup>**. adaptors in a high-quality facility, to assure 'randomness' of unique molecular identifiers (UMIs). Several providers may perform satisfactory, we can recommend Integrated DNA Technologies (IDT).
- Reagents needed only for **quantitative analysis** are marked with **QN** symbol.
- **If the primer extension method is chosen for addition of platform-specific sequencing adaptors certain primer modifications are necessary.**

❖ **Mint-2 cDNA synthesis kit, Evrogen (Cat# SK005)** – or else, with template-switch activity. This kit includes polymerase for subsequent PCRs; if a different kit is used - suitable, high-fidelity polymerase has to be also purchased. The Evrogen kit consists of:

- First-strand buffer
- DTT (20mM)
- dNTP mix (10mM each)
- Mint reverse transcriptase
- IP-solution
- 50X Encyclo polymerase mix
- 10X Encyclo buffer
- Set of various adapters for cDNA synthesis

❖ **PCR purification Kit (e.g. QIAquick, QIAGEN)/Agencourt AMPure XP beads [QN]**

❖ **Gel Extraction Kit (e.g. QIAquick, QIAGEN)**

❖ **RNase, DNase free water; RNase, DNase free plasticware**

❖ **USER™ enzyme, New England Biolabs (M5505S) [QN]**

❖ **Primers and adaptors:**

### STEP 1 (ss cDNA SYNTHESIS)

- **5' adapter**: PlugOligo-1 (in Mint-2 cDNA synthesis kit, Evrogen) **OR SmartNNNNA<sup>3</sup> [QN]**
- **Target-specific primer for cDNA synthesis** - complementary to 3' ending of the constant region of the TCR receptor chain of interest (here: bank vole TCR $\beta$ , *Myg1TCRb\_1*).

### STEP 2 (1<sup>ST</sup> PCR)

- **First step-out primer** Smart20<sup>1</sup>.  
Primer has to be modified if primer-extension method is chosen instead of ligation (see: *Smart20-mod*).
- **First target-specific PCR primer**, complementary to 3' ending of the constant region of the TCR receptor chain of interest (here: *Myg1TCRb\_2*).  
Primer has to be modified if primer-extension method is chosen instead of ligation (see: *Myg1TCRb\_3NN*).

### STEP 3 (2<sup>ND</sup> PCR)

- **Second step-out primer** Step\_1<sup>1</sup>.  
Primer has to be modified if primer-extension method is chosen instead of ligation. For an example see: *P5-50X*.
- **Second target-specific PCR primer**, complementary to 3' ending of the constant region of the TCR receptor chain of interest (here: *Myg1TCRb\_3*).  
Primer has to be modified if primer-extension method is chosen instead of ligation. For an example see: *P7-70X*.

## Procedure

### A. STEP 1: cDNA SYNTHESIS AND TEMPLATE SWITCH

- The following procedure is for up to 2µg of total RNA/up to 1µg of purified mRNA per 10 µl of final reaction volume. The RNA extraction protocol is not included herein, we recommend e.g., RNazol-based extraction. In some situations, use of purified mRNA may be preferred.
  - Reverse transcriptases differ in their 5'-template switching activity, therefore should be chosen with care. We successfully used suggested Mint-2 cDNA synthesis kit, Evrogen.
  - **Note change in adaptor and additional step for quantitative analysis with UMIs.**
1. Prepare 2 separate reaction tubes for two mixes - final volume will be **10 µl**.
  2. MIX1 (final volume 4µl):
    - RNA 1-3 µl (up to 2µg of total RNA or up to 1µg of polyA RNA in final volume)
    - cDNA synthesis primer (*Myg1TCRb\_1*) 1µl from 10µM stock (1 µM in final volume)
    - H<sub>2</sub>O, RNase free to 4 µl
  3. Place a tube with MIX1 into a thermal cycler and incubate for **4 min at 70°C**, and then **2 min at 42°C** (annealing synthesis primers).
  4. (Meanwhile) prepare second mix (final volume 6µl):  
MIX2:
    - First strand buffer (Evrogen, 5x) 2 µl
    - DTT (20uM) 1 µl
    - 5'-template switch adapter (15uM) 1 µl  
PlugOligo-1 Evrogen **OR SmartNNNNa [QN]**
    - dNTP solution (10mM each) 1 µl
    - Mint Reverse Transcriptase (10x) 1 µl
  5. Add MIX2 to MIX1, mix by pipetting, incubate at **42°C for 40-60 min**. Do not remove the reaction tube from the thermal cycler except for the time necessary to add MIX2.
  6. Add 5ul of IP solution (MINT reverse transcriptase, Evrogen) and incubate for additional **1h at 42°C**. Do not remove the reaction tube from the thermal cycler except for the time necessary to add IP-solution.
  7. After incubation, place the tubes on ice to terminate the first-strand cDNA synthesis.
  8. **Add 1 ul of Uracyl DNA glycosylase – USER™ enzyme – 5U, incubate 1h at 37°C. [QN only]**
  9. Product can be stored in +4°C for several hours, or at -20°C for up to one month. However, prompt proceeding to the next step is advised.

## B. STEP 2: FIRST PCR

- Polymerase with high fidelity and processivity should be used for amplification. Hotstart Encyclo polymerase (Evrogen) included in Mint-2 cDNA synthesis kit has 5'→3' DNA polymerase activity with high processivity and proofreading 3'→5' exonuclease activity.
- If the first-strand cDNA samples were stored at -20°C, pre-heat them at 65°C for 1 min, then mix by gently flicking the tubes before taking aliquots.
- The number of PCR cycles and the volume of template in the PCRs will depend on the starting RNA concentration. For optimization see Mamedov et al. (2013).
- [Note change in primers if primer-extension method was chosen for addition of sequencing platform adaptors.](#)

1. In a sterile tube mix the following (final volume: 25 µl):

- First strand cDNA 1-2.5 µl
- dNTP (10mM each) 0.4 µl (final concentration: 0.16 mM each)
- F primer Smart20 (10uM) 1.25 µl (final concentration: 0.5 µM)  
**OR *Smart20-mod***
- R primer (*Myg/TCRb\_2*, 10 uM) 1.25 µl (final concentration: 0.5 µM)  
**OR *Myg/TCRb\_3NN***
- Polymerase (Encyclo, 50x) 0.5 µl
- Buffer (10x Encyclo) 2.5 µl
- H<sub>2</sub>O up to 25 µl

2. PCR conditions (18-23 cycles):

Initial denaturation: 95°C for 1 min,  
95°C for 20 s  
65°C for 20 s  
72°C for 50 s  
Final elongation: 2 min

3. PCR products should be purified (e.g. using QIAquick PCR purification Kit, QIAGEN), especially if a pause is needed. This step is important since it removes the residual enzyme activities of proofreading polymerases that can damage the obtained PCR library. If **quantitative protocol** with UMIs (SmartNNN 5' adaptor) is implemented we **strongly recommend** to purify the 1<sup>st</sup> PCR product with **Agencourt AMPure XP beads** with 1:0.6 ratio of DNA:beads, to remove short, nonspecific products and primer/adaptor-dimers.
4. Purified first PCR product can be stored at -20°C for a month.

### C. STEP 3: SECOND PCR

- The number of PCR cycles and the volume of template in the PCRs will depend on the starting RNA concentration. For optimization see Mamedov et al. (2013).
  - Note change in primers if primer-extension method was chosen for addition of sequencing platform adaptors.
1. In a sterile tube mix the following (final volume: 25 µl):
    - First PCR product (purified) 1-5 µl
    - dNTP (10mM each) 0.4 µl (final concentration: 0.16 mM each)
    - F primer Step\_1 (10uM) 3.75 µl (final concentration: 1.5 µM)  
**OR P5-50X**
    - R primer (*MyglTCRb\_3*, 10 uM) 3.75 µl (final concentration: 1.5 µM)  
**OR P7-70X**
    - Polymerase (Encyclo, 50x) 0.5 µl
    - Buffer (10x Encyclo) 2.5 µl
    - H<sub>2</sub>O up to 25 µl
  2. PCR conditions (9-14 cycles):  
Initial denaturation: 95°C for 1 min,  
95°C for 20 s  
65°C for 20 s  
72°C for 50 s  
Final elongation: 5 min
  3. Although purification of the product with either QIAquick PCR purification Kit or Agencourt AMPure XP beads is possible, we **strongly recommend** to run the 2<sup>nd</sup> PCR product on agarose gel and excise bands of desired size (~600 bp), using e.g. QIAquick Gel Extraction Kit (QIAGEN). This step should be carried out as soon as possible after the PCR, to prevent residual enzyme activities, that can damage the obtained PCR library.
  4. Libraries can be stored for weeks in -20°C.

### D. SEQUENCING

- If ligation was chosen for addition of sequencing platform adaptors, these **must be ligated to the product of the STEP 3** (2<sup>nd</sup> PCR) with an appropriate kit (e.g. NEBNext® DNA Library Prep Master Mix Set for Illumina®, NEB).
- If primer-extension method was chosen for addition of sequencing platform adaptors, the purified products of the STEP 3 (2<sup>nd</sup> PCR) are ready for paired-end sequencing.

**Author: Magdalena Migalska**  
Evolutionary Biology Group  
Faculty of Biology; Adam Mickiewicz University  
ul. Umultowska 89, 61-614 Poznan, Poland;  
e-mail: [magdalena.migalska@amu.edu.pl](mailto:magdalena.migalska@amu.edu.pl)

## Supplementary File S2.

```
>BV_TRBJ1-1*01
GGTAAAGGAACCAGGCTCACAGTG
>BV_TRBJ1-2*01
GGCTCAGGGACCAGGCTTTTGGTA
>BV_TRBJ1-2*02
GGCTCAGGGACCAAGCTTTTGGTA
>BV_TRBJ1-2*03
GGCTCAGGGACCATGCTTTTGGTA
>BV_TRBJ1-3*01
GGAGAAGGAAGTCGGCTCACTGTT
>BV_TRBJ1-3*02
GGAGAAGGAAGCCAGCTCACTGTT
>BV_TRBJ1-3*03
GGAGAAGGAAGCCGGCTCACTGTT
>BV_TRBJ1-4*01
GGTCATGGAACCAAGCTGTCTGTC
>BV_TRBJ1-5*01
GGAGAGGGGACTCGACTGTCTGTT
>BV_TRBJ2-1*01
GGACCAGGCACGCGACTCACGGTG
>BV_TRBJ2-2*01
GGAGAAGGCTCCAAGTTGATAGTG
>BV_TRBJ2-3*01
GGCCCAGGAACCAGACTGACCGTG
>BV_TRBJ2-3*02
GGTCCAGGAACCAGACTGACCGTG
>BV_TRBJ2-4*01
GGTGCAGGCACCCGATTGACAGTC
>BV_TRBJ2-4*02
GGTGCAGGCACCCGATTGACAGTT
>BV_TRBJ2-5*01
GGGCCAGGCACGCGTCTCCTCGTG
>BV_TRBJ2-7*01
GGTCCAGGCACCAGGCTCACGGTC
```



Supplementary File S3.

>BV\_TRBV01\*01

ATAA<sup>3</sup>CTTTGCTGGAGCAGCAGCCTAGGTGGGGTCTGGTACGTCGTGGTCAAGCTGTGACC  
CTGCGCTGTATCTTGAAGAATTCCCAGTACCCATGGCTGAGCTGGTACCAGCAGGATCTC  
CAACAGCAACTACAATGGCTAGTCTCTCTGCGGAGTTCTGGGGACAAAGAGGCCAAATCT  
CTCCCTGGTGCTGATTACCTGGCCACACGAGTCA<sup>3</sup>CGGATACAGAGCTGAGGCTCCAAGTG  
ACCAACATGACCCAGAGCAGAACCTTGTATTGCACCTGC

>BV\_TRBV01\*02

ATAA<sup>3</sup>CTTTGCTGGAGCAGCAGCCTAGGTGGGGTCTGGTACGTCGTGGTCAAGCTGTGACC  
CTGCGCTGTATCTTGAAGAATTCCCAGTACCCATGGCTGAGCTGGTACCAGCAGGATCTC  
CAACAGCAACTACAATGGCTAGTCTCTCTGCGGAGTTTTGGGGACAAAGAGGCCAAATCT  
CTCCCTGGTGCTGATTACCTGGCCACACGAGTCA<sup>3</sup>CTGATACAGAGCTGAGGCTCCAAGTG  
ACCAACATGACCCAGAGCAGAACCTTGTATTGCACCTGC

>BV\_TRBV01\*03

ATAA<sup>3</sup>CTTTGCTGGAGCAGCAGCCTAGGTGGGGTCTGGTACGTCGTGGTCAAGCTGTGACC  
CTGCGCTGTATCTTGAAGAATTCCCAGTACCCATGGCTGAGCTGGTACCAGCAGGATCTC  
CAACAGCAACTACAATGGCTAGTCTCTCTGCGGAGTTCTGGGGACAAAGAGGCCAAATCT  
CTCCCTGGTGCTGATTACCTGGCCACACGAGTCA<sup>3</sup>CTGATACAGAGCTGAGGCTCCAAGTG  
ACCAACATGACCCAGAGCAGAACCTTGTATTGCACCTGC

>BV\_TRBV01\*04

ATAA<sup>3</sup>CGTTGCTGGAGCAACAGCCTAGGTGGGGTCTGGTACGTCGTGGTCAAGCTGTGACC  
CTGCGCTGTATCTTGAAGAATTCCCAGTACCCATGGATGAGCTGGTACCAGCAGGATCTC  
CAACAGCAACTACAATGGCTAGTCTCTCTGCGGAGTTCTGGGGACAAAGAGGCCAAATCT  
CTCCCTGGTGCTGATTACCTGGCCACACGAGTCA<sup>3</sup>CTGATACAGAGCTGAGACTCCAAGTG  
GCTAACATGACCCAGAGCAGAACCTTGT<sup>3</sup>TTTGCACCTGC

>BV\_TRBV01\*05

ATAA<sup>3</sup>CGTTGCTGGAGCAGCAGCCTAGTTGGGGTCTGGTACGTCGTGGTCAAGCTGTGACC  
CTGCGCTGTATCTTGAAGAATTCCCAGTACCCATGGATGAGCTGGTACCAGCAGGATCTC  
CAACAGCAACTACAGTGGCTGTT<sup>3</sup>CAGTCTGGGGAGTTCTGGGGACAAAGAGGCCAAATCT  
CTCCCTGGTGCTGATTACCTGGCCACACGAGTCA<sup>3</sup>CTGATACAGAGCTGAGACTCCAAGTG  
GCTAACATGACCCAGAGCAGAACCTTGTATTGCACCTGC

>BV\_TRBV01\*06

ATAA<sup>3</sup>CTTTGCTGGAGCAGCAGCCTAGTTGGGGTCTGGTACGTCGTGGTCAAGCTGTGACC  
CTGCGCTGTATCTTGAAGAATTCCCAGTACCCATGGATGAGCTGGTACCAGCAGGATCTC  
CAACAGCAACTACAGTGGCTGTT<sup>3</sup>CAGTCTGGGGAGTTCTGGGGACAAAGAGGCCAAATCT  
CTCCCTGGTGCTGATTACCTGGCCACACGAGTCA<sup>3</sup>CTGATACAGAGCTGAGACTCCAAGTG  
GCTAACATGACCCAGAGCAGAACCTTGTATTGCACCTGC

>BV\_TRBV02\*01

GACCCTAGAATTACCCAGAAACCAAACATGTGGTGGCAGTCA<sup>3</sup>CAGGGAATGAAAGGACC  
CTGGAATGTCATCAGTATCTAGGTCACAATGCGATGTACTGGTATAGACAAAGCGCTAAG  
AGGTCCCTAGA<sup>3</sup>ACTCATGTTTTCTATAACTATCAAAATCTCGTTGAAAACCAGACTATC  
CAAAGTCGCTTCCAGCCTCACAATCCAGAGAAATCCTCCTTAGACCTTCAGATCTCCGCC  
CTGGAACCTGGCGACTCGGCCACATATTTCTGC

>BV\_TRBV02\*02

GACCCTAGAATTACCCAGAAACCAAACATGTGGTGGCAGTCA<sup>3</sup>CAGGGAATGAAAGGACC  
CTGGAATGTAATCAGTATCTAGGTCACAATGCGATGTACTGGTATAGACAAAGCGCTAAG  
AGGTCCCTAGAGCTCATGTTTTCTATAATTATCAAAATCTCGTTGAAAACCAGACTATC  
CAAAGTCGCTTCCAGCCTCACAATCCAGAGAAATCCTTCTTAGACCTTCAGATCTCCGCC  
CTGGAACCTGACGACTCGGCCACATATTTTTGC

>BV\_TRBV02\*03

GACCCTAGAATTACCCAGAAACCAAGACATGTGGTGGCAGTCA<sup>3</sup>CAGGGAATGAAAGGACC  
CTGGAATGTCATCAGTATCTAGGTCACAATGCGATGTACTGGTATAGACAAAGCGCTAAG  
AGGTCCCTAGA<sup>3</sup>ACTCATGTTTTCTATAACTATCAAAATCTCGTTGAAAACCAGACTATC

CAAAGTCGCTTCCAGCCTCACAATCCAGAGAAATCCTCCTTAGACCTTCAGATCTCCGCC  
CTGGAACCTGGCGACTCGGCCACATATTTCTGC

>BV\_TRBV02\*04

GACCTTAGAATTACCCAGAAACCAAAACATGTGGTGGCAGTCACAGGGAATGAAAGGACC  
CTGGAATGTAATCAGTATCTAGGTCACAATGCGATGTACTGGTATAGACAAAGCGCTAAG  
AGGTCCCTAGAGCTCATGTTTTCTATAACTATCAAAATCTCGTTGAAAACCAGACTATC  
CAAAGTCGCTTCAAGTCTCACAATCCAGAGAAATCCTACTTAGACCTTCAGATCTCCGCC  
CTGGAACCTGACGACTCGGCCACGTATTTCTGC

>BV\_TRBV03\*01

GGACCCAACGTCTTGCAGTTCCCAAGTCATCAAGTGACACGTGAGGGGCAGATGGTGATC  
CTCAGTTGTGACCCTGTCTCTAATCACCAGTCCTTCTATTGGTATAAACTGATCTTGGGA  
CAAAACATAGAGTTTCTGGTTTTCTTTCTACAGTGGTAAACCTATGGAAAAGTCTAAGCTA  
TTCGAGGAGGATCGATTTTTCAGTCGAAAGGCAAGAGGATTCATATTTCACTCTGAAGATA  
CAGCCCACAACGCCGGAGGACTCAGCCGTGTACTTCTGT

>BV\_TRBV03\*02

GGACCCAACGTCTTGCAGTTCCCAAGTCATCAAGTGATACGTGAGGGGCAGATGGTGATC  
CTCAGTTGTGACCCTGTCTCTAATCACCAGTCCTTCTATTGGTATAAACTGATCTTGGGA  
CAAAACATAGAGTTTCTGGTTTTCTTTCTACAATGGTAAACCTATGGAAAAGTCTAAGCTA  
TTCGAGGAGGATCGATTTTTCAGTCGAAAGGCAAGAGGGTTCATATTTCACTCTGAAGATA  
CAGCCCACAACGCTGGAGGACTCAGCCGTGTACTTCTGT

>BV\_TRBV03\*03

GGACCCAGCGTCTTGCAGTTCCCAAGTCATCAAGTGACACGTGAGGGGCAGATGGTGATC  
CTCAGTTGTGACCCTGTCTCTAGTCACCTGTACTTCTATTGGTATAAACTGATCTTGGGA  
CAGAAGATAGAGTTTTTGGTTTTCTTTTACAATGGTAAACCTATGGAAAAGTCTAAGCTA  
TTCGAGGAGGATCGATTTTTCAGTCGAAAGGCAAGAGGATTCATATTTCACTCTGAAGATA  
CAGCCCACAACGCCGGAGGACTCAGCCGTGTACTTCTGT

>BV\_TRBV03\*04

GGACCCAACGTCTTGCAGTTCCCAAGTCATCAAGTGACACGTGAGGGGCAGATGGTGATC  
CTCAGTTGTGACCCTGTCTCTAGTCACCTGTACTTCTATTGGTATAAACTGATCTTGGGA  
CAGAAGATAGAGTTTTTGGTTTTCTTTCTACAATGGTAAACCTATGGAAAAGTCTAAGCTA  
TTCGAGGAGGATCGATTTTTCAGTCGAAAGGCAAGAGGATTCATATTTCACTCTGAAGATA  
CAGCCCACAACGCCGGAGGACTCAGCCGTGTACTTCTGT

>BV\_TRBV03\*05

GGACCCAACGTCTTGCAGTTCCCAAGTCATCAAGTGATACATGAGGGGCAGATGGTGACC  
CTCAGTTGTGACCCTGTCTCTAATCACCCTGTACTTCTATTGGTATAAACTGATCTTGGGA  
CAGAAGATAGAGTTTCTGGTTTTCTTTCTACGATGGTAAACCTATGGATAAGTCTAAGCTA  
TTCAAGGAGGATCGATTTTTCAGTCGAAAGGCAAAAGGTTTCATATTTCACTCTGAAGATA  
CAGCCCACAACGCTGGAGGACTCAGCCGTGTACTTCTGT

>BV\_TRBV04\*01

GAGACAACGTGTTTTCCAGAATCCACAATATCTTGTACGCAGGTGGGAAACAAAGCATCT  
CTCAAGTGTGACCAAGATCTGGGCCATGATGCTATGTACTGGTACAAACAAGACTCTAAG  
CAATCTCTGAAGATTATGTTTATCTACAATAGCAAGCAACTCATTTTAAATGAATCGGTT  
CCAAGTCGCTTCTCACCTCAGTCTCCAGATAAAGCTCATCTGAATCTTCAAGTCAGGCTT  
GTAGAACCGGATGACTCTGCTGTGTACTTCTGT

>BV\_TRBV04\*02

GAGACAACGTGTTTTCCAGAATCCACAGTATCTTGTACGCAGGTGGGAAATAAAGCATCT  
CTCAAGTGTGACCAAGATCTGGGCCATGATGCTATGTACTGGTACAAACAAGACTCTAAG  
CAATCTCTGAAGATTATGTTTATCTACAATAACAAGGAACTCATTTTAAATGAATCGGTT  
CCAAGTCGCTTCTCACCTCAGTCTCCAGATAAAGCTCATCTGAATCTTCAAGTCAGGCTT  
GTAGAACCGGATGACTCTGCTGTGTACTTCTGT

>BV\_TRBV05\*01

AACACTAAAATTGCCAGACACCAAGATATCTGGTTCATGGGAAGAGCAAATAATAAGTCT

TTGGATTGTAACAACATCTGGGACATAATGCTATGTACTGGTATCAACAGAAAGCTGGG  
AAGCCCCTAGAGCTCATGTTTCTCTACAATCTTAAAAACCTGATTCAAATGAGACTGTG  
CCCCTTCGTTTCTTACCTGAATGCCAGACACCTCCCAGTTGTTCCCTCACCTGTCTGGC  
CTGGAGCCAGAAGACTCAGCTGTGTACTGGTGT

>BV\_TRBV05\*02

AACACTAAAATTACCCAGACACCAAGATATCTGGTTCATGGGAAGAGCAAATAATAAGTCT  
TTGGATTGTAACAACATCTGGGACATAATGCTATGTACTGGTATCAACAGAAAGCTGGG  
AAGCCCCCAGAGCTCATGTTTCTCTACAATCTTAAAAACCTGATTCAAATGAGACTGTG  
CCCCTTCGTTTCTTACCTGAATGCCAGACACCTCCCAGTTGTTCCCTCACCTGTCTGGC  
CTGGAGCCAGAAGACTCAGCTGTGTACTGGTGT

>BV\_TRBV05\*03

AACACTAAAATTGCCAGACACCAAGATATCTGGTTCATGGGAAGAGCAAATAATAAGTCT  
TTGGATTGTAACAACATCTGGGACATAATGCTATGTACTGGTATCAACAGAAAGCTGGG  
AAGCCCCTAGAGCTCATGTTTCTCTACAATCTTAAAAATCTGATTCAAATGAGACTGTG  
CCCCTTCGTTTCTTACCTGAATGCCAGACACCTCCCAGTTGTTCCCTCACCTGTCTGGC  
CTGGAGCCAGAAGACTCAGCTGTGTACTGGTGT

>BV\_TRBV08\*01

AGTGCTGGCATTATTCAGACTCCCAAATCGATGCTCGTGAAGACAGGACAGCATGTGTCA  
ATGAAATGTACTCAGGATATGAAACATGACTCCATGTTCTGGTACCGACAGGATCCAGGG  
CTGGGGCTGAGACTCATCTACGACTCATATGATGTTGGCATCACTGACAAAGGAGATGTC  
CCTGAGGGGTACAATGTTTCCAGATCAAACACAAAGGACTTCTTCCCTTATTCTGGAGTCA  
GCCTCCCCCTCCCAGACATCTGTGTACTTCTGT

>BV\_TRBV08\*02

AGTGCTGGCATTATTCAGACTCCCAAATCGATGCTCGTGAAGACAGGACAGCATGTGTCA  
ATGAAATGTACTCAGGATATGAAACATGACTCCATGTTCTGGTACCGACAGGATCCAGGG  
CTGGGGCTGAGACTCATCTACTACTCATATGATGTTGGCATCACTGACAAAGGAGATGTC  
CCTGAGGGGTACAATGTTTCCAGATCAAACAAAAAGGACTTCTTCCCTTATTCTGGAGTCA  
GCCTCCCCCTCCCAGACATCTGTGTACTTCTGT

>BV\_TRBV09\*01

AATGCTGGAGTTTCCCAATCTCCCTTGCACAGAATTATAAAGAGGGGACAAGATGTAGCC  
CTTGAGTGTGATCCAGTTTCTGGCCACAGAGGTCTTTACTGGTACCGACAGAACCTGGGG  
CAAGGACCAGTGTTCATGGTATCTTTCCAGGATGAGCTTTTATCAGACAAATCTGGGATG  
CCTAATGATCGTTTCTCTGCAGGGAGGCCTGCGGGTTCCTCCTCCACTCTGAAGATCCAG  
TCTACAGATCAAGAGGACTCGGGCATATACCTCTGT

>BV\_TRBV10\*01

GATGCTGGAATCACTCAGACACCTAGATACTGGATCGTGCTGACAGGAAGAAAGATGACC  
CTGGAATGTTCTCAGAATATGAACCACTATTCGATGTTCTGGTATCGACAAAATGCGGGA  
GAGGGATTGAAGCTCATCTATTACTCAGGAAGTGTGGCAGCACTACCAAAGGAGATGTC  
CCCGAAGGATACAGTGTCTCCAGAAACAAGAGCGAGCATTTCCTCCCTGACATTAGGCTCA  
GCCAGGCCAGCCAGACCTCCACCTACTTCTGT

>BV\_TRBV10\*02

GATGCTGGAATCACTCAGACACCTAGATACTGGATCGTGCTGACAGGAAGAAAGATGACC  
CTGGAATGTTCTCAGAATATGAACCACTATTCGATGTTCTGGTATCAACAAAATGCGGGA  
GAGGAATTGAAGCTCATCTATTACTCAGGAAGTGTGGCAGCACTACCAAAGGAGATGTC  
CCAGAAGGATACAGTGTCTCCAGAAACAAGAGCGAGCATTTCCTCCCTGGCATTAGGCTCA  
GCCAGGCCAGCCAGACCTCCACCTACTTCTGT

>BV\_TRBV10\*03

GATGCTGGAATCACTCAGACACCTAGATACTGGATCGTGCTGACAGGAAGAAAGATGACC  
CTGGAATGTTCTCAGAATATGAACCACTATTCGATGTTCTGGTATCGACAAAATGCGGGA  
GAGGGATTGAAGCTCATCTATTACTCAGGAAGTGTGGCAGCACTACCAAAGGAGATGTC  
CCAGAAGGATACAGTGTCTCCAGAAACAAGAGCGAGCATTTCCTCCCTGGCATTAGGCTCA  
GCCAGGCCAGCCAGACCTCCACCTACTTCTGT

>BV\_TRBV10\*04

GATGCTGGAATCACTCAGACACCTAGATACTGGATCGTGCTGACAGGAAGAAAGATGACC  
CTGGAATGTTCTCAGAATATGAACCACTATTGGATGTTCTGGTATCGACAAGATGCGGGA  
GAGGGACTGAAGCTGATCTATTACTCAGGAAGTGTGGCAGCACTACCAAAGGGGATGTC  
CCAGAAGGATACAGTGTCTCCAGAAACAAGAGCGAGCATTTCCTACTGGCATTAGGCTCA  
GCCAGGCCAGCCAGACCTCCACCTACTTCTGT

>BV\_TRBV10\*05

GATGCTGGAATCACTCAGACACCTAGATACTGGATCGTGCTGACAGGAAGAAAGATGACC  
CTGGAATGTTCTCAGAATATGAACCACTATTGGATGTTCTGGTATCGACAAGATGCGGGA  
GAGGGACTGAAGCTGATCTATTACTCAGGAAGTGTGGCAGCACTACCAAAGGGGATGTC  
CCAGAAGGATACAGTGTCTCCAGAAACAAGAGCGAGCATTTCCTCGCTGGCATTAGGCTCA  
GCCAGGCCAGCCAGACCTCCACCTACTTCTGT

>BV\_TRBV1201\*01

AGTCCCAGGGTCCATCCAGTCTCCAAGACACATAATCAAAGCAAAGGGAGGAAGGTCCACT  
CTCAAATGTACTCCCATCTCTGGACATGATACTGTGTTCTGGTATCAGCAATCTCAGGGG  
AAGGAACTGAAGTTCCTTATTCAACACTTTGAAAAAATGGAGAGAGCGAAAGGAAACATA  
CCCAACCGATTCTCAGTCCAGCAGTTCAGTGACTATCACTCTGAGATGAACATGAGCGCC  
TTGCAGCTGGAGGACTCTGCTGTGTACTTCTGT

>BV\_TRBV1201\*02

AGTCCCTGGGGTCCATCCAGTCTCCAAGACACATAATCAAACAAAGGGAGGAAGGTCCACT  
CTCAAATGTACTCCCATCTCTGGACATGACAGTGTGGGCTGGTACCAGCAATCTCAGGGG  
AAGGAACTGAAGTTCCTTATTCAACACTATGAAAAAATGGAGAGAGCGAAAGGAAACATA  
CCCAACCGATTCTCAGTCCAGCAGTTCAGTGACTATCACTCTGAGATGAACATGAGCGCC  
TTGCAACTGGAGGACTCTGCTGTGTACTTCTGT

>BV\_TRBV1201\*03

AGTCCCAGGGTCCATCCAGTCTCCAAGACACATAATCAAACAAAGGGAGGAAGGTCCACT  
CTCAAATGTACTCCCATCTCTGGACATGACAGTGTGGGCTGGTACCAGCAATCTCAGGGG  
AAGGAACTGAAGTTCCTTATTCAACACTATGAAAAAATGGAGAGAGAGAAAGGAAACATA  
CCCAGCCGATTCTCAGTCCAGCAGTTCAGTGACTATCACTCTGAGATGAACATGAGCGCC  
TTGCAGCTGGAGGACTCTGCTGTGTACTTCTGT

>BV\_TRBV1201\*04

AGTCCCAGGGTCCATCCAGTCTCCAAGACACATAATCAAAGCAAAGGGAGGAAGGTCCACT  
CTCAAATGTACTCCCATCTCTGGACATGATACTGTGTTCTGGTATCAGCAATCTCAGGGG  
AAGGAACTGAAGTTCCTTATTCAACACTTTGAAAAAATGGAGAGAGCGAAAGGAAACATA  
CCCAACCGATTCTCAGTCCAGCAGTTCAGTGACTCTCACTCTGAGATGAACATGAGCGCC  
TTGCAGCTGGAGGACTCTGCTGTGTACTTCTGT

>BV\_TRBV1202\*01

AGTCCCAGGGTCCGTCAGTCTCCAAGATACATAATCAAACAAAGGGAGGAAGTCCCTTT  
CTCAAATGTACTCCCATCTCTGGACAGGACAATGTGTTCTGGTACCAGCAGACTCTGGGG  
CAGAGACTGAAGTTCCTCATTCAACACTATAAAAGAATGGAGAGAGCGAAAGGAAACATA  
CCCAGCCGATTCTCAGTCCAGCAGTTCAGTGACTCTCACTCTGAGATGAACATGAGCGCC  
TTGCAGCTGGAGGACTCTGGTGTGTACTTCTGT

>BV\_TRBV1202\*02

AGTCCCAGGGTCCGTCAGTCTCCAAGATACATAATCAAACAAAGGGAGGAAGTCCCTTT  
CTCAAATGTACTCCCATCTCTGGACAGGACAATGTGTTCTGGTACCAGCAGACTCTGGGG  
CAGAACTGAAGTTCCTCATTCAACACTATAAAAGAATGGAGAGAGCGAAAGGAAACATA  
CCCAACCGATTCTCAGTCCAGCAGTTCAGTGACTCTCACTCTGAGATGAACATGAGCGCC  
TTGCAGCTGGAGGACTCTGCTGTGTACTTCTGT

>BV\_TRBV1202\*03

AGTCCCAGGGTCCGTCAGTCTCCAAGATACATAATCAAACAAAGGGAGGAAGTCCCTTT  
CTCAAATGTACTCCCATCTCTGGACAGGACAATGTGTTCTGGTACCAGCAGACTCTGGGG  
CAGAGACTGAAGTTCCTCATTCACTATAAAAGAATGGAGAGAGCGACAGGAAACATA

TCCAAACGATTCTCAGTTCAGCAGTTCAGTGACTCTCACTCTGAGATGAACATGAGCGCC  
TTGCAGCTGGAGGACTCTGCTGTGTACTTCTGT  
>BV\_TRBV1203\*01  
AGTCCCAGGGTTCGTCCAGTCTCCAAGACACATAATCAAAGCAAAGGGAGGAAGGTCCTTT  
GTGAAATGTACTCCCATCGATGGACATAACACTGTGTTCTGGTACCAGCAGACTCTGGGG  
CAGAACTGAAGTTCCTCATTCAACACTATGAAAAAATGGAGAGAGAGAAAGGAAACATA  
CCCAGTCGATTCTCAGTCCAGCAGTTCAGTGACTATCACTCTGAGATGAACATGAGCGCC  
TTGCAGCTGGAGGACTCTGCTGTGTACTTCTGT  
>BV\_TRBV1203\*02  
AGTCCCAGGGTTCGTCCAGTCTCCAAGACACATAATCAAAGCAAAGGGAGGAAGGTCCTTT  
GTGAAATGTACTCCCATCGATGGACATAACACTGTGTTCTGGTACCAGCAGACTCTGGGG  
CAGGAACTGAAGTTCCTCATTCAACACTATGAAAAAATGGAGAGAGAGAAAGGAAACATA  
CCCAGTCGATTCTCAGTCCAGCAGTTCAGTGACTATCACTCTGAGATGAACATGAGCGCC  
TTGCAGCTGGAGGACTCTGCTGTGTACTTCTGT  
>BV\_TRBV1203\*03  
AGTCCCAGGGTTCGTCCAGTCTCCAAGACACATAATCAAAGCAAAGGGAGGAAGGTCCTTT  
GTGAAATGTACTCCCATCGATGGACATAACACTGTGTTCTGGTACCAGCAGACTCTGGGG  
CAGGAACTGAAGTTCCTCATTCAACACTATGAAAAAATGGAGAGAGCGAAAGGAAACATA  
CCCAGTCGATTCTCAGTTCAGCAGTTCAGTGACTATCACTCTGAGATGAACATGAGCGCC  
TTGCAGCTGGAGGACTCTGCTGTGTACTTCTGT  
>BV\_TRBV1203\*04  
AGTCCCAGGGTTCGTCCAGTCTCCAAGACACATAATCAAAGCAAAGGGAGGAAGGTCCTTT  
GTGAAATGTACTCCCATCGATGGACATAACACTGTGTTCTGGTACCAGCAGACTCTGGGG  
CAGGAACTGAAGTTCCTCATTCAACACTATGAAAAAATGGAGAGAGAGAAAGGAAACATA  
CCCAGCCGATTCTCAGTCCAGCAGTTCAGTGACTATCACTCTGAGATGAACATGAGCGCC  
TTGCAGCTGGAGGACTCTGCTGTGTACTTCTGT  
>BV\_TRBV1204\*01  
AGTCCCAGGGTTCGTCCAGTCTCCAAGACACATAATCAAAGCAAAGGGAGGAAGGTCCTTT  
GTGAATTGTACTCCCATCTCTGGACATGCCAGTGTGTTCTGGTACCAGCAGACTCTGGGC  
CAGGAACTGAAGTTCCTCATTTCAGCATTATGAAAAAATGGAAAGAGAGAAAGGAAATATA  
CCCAACCGATTCTCAGTCCAGCAGTTCAGTGACTATCACTCTGAGATGAACATGAGCACC  
TTGCAGCTGGAGGACTCGGCGGTGTACCTCTGC  
>BV\_TRBV1204\*02  
AGTCCCAGGGTTCGTCCAGTCTCCAAGACACATAATCAAAGCAAAGGGAGGAAGGTCCTTT  
GTGAATTGTACTCCCATCTCTGGACATGCCAGTGTGTACTGGTACCAGCAGACTCTGGGC  
CAGGAACTGAAGTTCCTCATTTCAGCATTATGAAAAAATGGAAAGAGAGAAAGGAAATATA  
CCCAACCGATTCTCAGTCCAGCAGTTCAGTGACTATCACTCTGAGATGAACATGAGCACC  
TTGCAGCTGGAGGACTCGGCGGTGTACCTCTGC  
>BV\_TRBV1204\*03  
AATCCCAGGGTTCGTCCAGTCTCCAAGACACATAATCAAAGCAAAGGGAGGAAGGTCCTTT  
GTGAATTGTACTCCCATCTCTGGACATGCCAGTGTGTACTGGTACCAGCAGACTCTGGGC  
CAAGAACTGAAGTTCCTCATTTCAGCATTATGAAAAAATGGAAAGAGAGAAAGGAAATATA  
CCCAACCGATTCTCAGTCCAGCAGTTCAGTGACTATCACTCTGAGATGAACATGAGTGC  
TTGGAGCTGGAGGACTCGGCGGTGTACCTCTGC  
>BV\_TRBV1205\*01  
AGTCCCAGGGTTCATCCAGTCTCCAAGACACATAATCAAAGCAAAGGGAGGAAGGTCCTTT  
ATGAATTGTACTCCCATCTCTGGACATGATACTGTGTTCTGGTACCAGCAGACTCTGGGG  
CAGGAACTGAAGTTCCTCATTTCAGCATTATCAAAAAACGGAGGGAGAGAAAGGAAACATA  
CCCAGCCGATTCTCAGTCCAGCAGTTCAGTGACTATCACTCTGAGATGAACATGAGCGCC  
TTGCAGCTGGAGGACTCTGCTGTGTACTTCTGT  
>BV\_TRBV1205\*02  
AGTCCCAGGGTTCATCCAGTCTCCAAGACACATAATCAAAGCAAAGGGAGGAAGGTCCTTT

ATGAATTGTACTCCCATCTCTGGACATGATACTGTGTTCTGGTACCAGCAGACTCTGGGG  
CAGGAACTGAAGTTCCTCATT CAGCATTATCAAAAAACGGAGGGAGAGAAAGGAAACATA  
CCCAGCCGATTCTCAGTCCAGCAGTTCAGTGACTATCACTCTGAGATGAACATGAGCGCC  
TTGCAGCTGGAGGACTCTGGTGTGTACTTCTGT

>BV\_TRBV1206\*01

AGTCCC GGGGTCGTCCAGTCTCCAAGACACATAATCAAAGCAAAGGGAGGAAGGTCTTT  
GTGAATTGTACTCCCATCTCTGGACATAACACTGTGTTCTGGTACCAGCAGACTCTGGGG  
CAGGAACTGAAGTTCCTCATT CCGCATTATCAAGAAATGGAAGGAGAGAAAGGAAACATA  
CCCAGCCGATTCTCAGTCCAGCAGTTTAGTGACTATCACTCTGAGATGAACATGAGCGCC  
TTGCAGCTGGAGGACTCTGCCGTGTACTTCTGT

>BV\_TRBV1206\*02

AGTCCC GGGGTCATCCAGTCTCCAAGACACATAATCAAAGCAAAGGGAGGAAGGTCTTT  
GTGAATTGTACTCCCATCTCTGGACATAACACTGTGTTCTGGTACCAGCAGACTCTGGGG  
CAGGAACTGAAGTTCCTCATT CCGCATTATCAAGAAATGGAGGGAGAGAAAGGAAACATA  
CCCAGCCGATTCTCAGTCCAGCAGTTTAGTGACTATCACTCTGAGATGAACATGAGCGCC  
TTGCAGCTGGAGGACTCTGCCGTGTACTTCTGT

>BV\_TRBV1206\*03

AGTCCC GAGTTCGTCCAGTCTCCAAGACACATAATCAAAGCAAAGGGAGGAAGGTCTTT  
GTGAATTGTACTCCCATCTCTGGACATGATACTGTGTTCTGGTACCAGCAGACTCTGGGC  
CAGGAACTGAAGTTCCTCATT CCGCATTATCAAGAAATGGAGGGAGAGAAAGGAAACATA  
CCCAACCGATTCTCAGTCCAGCAGTTCAGTGACTATCACTCTGAGATGAACATGAGCGCC  
TTGCAGCTGGAGGACTCTGCCGTGTACTTCTGT

>BV\_TRBV1206\*03

AGTCCC GGGGTCATCCAGTCTCCAAGACACATAATCAAAGCAAAGGGAGGAAGGTCTTT  
GTGAATTGTACTCCCATCTCTGGACATAACACTGTGTTCTGGTACCAGCAGACTCTGGGG  
CAGGAACTGAAGTTCCTCATT CCGCATTATCAAGAAATGGAGGGAGAGAAAGGAAACATA  
CCCAGCCGATTCTCAGTCCAGCAGTTCAGTGACTATCACTCTGAGATGAACATGAGCGCC  
TTGCAGCTGGAGGACTCTGCTGTGTACTTCTGT

>BV\_TRBV1207\*01

AGTCCC GGGGTTGTCCAGTCTCCAAGACACATAATCAAAGCAAAGGGAGGAAAGTCTTT  
GTGAATTGTACTCCCATCTCTGGACATAACACTGTGTTCTGGTATCAGCAGACTCTGGGG  
CAGGAACTGAAGTTCCTCATT CAGCATTGAAAAAATAGAGAGCGAGAAAGGAAACATA  
CCCAACCGATTCTCAGTCCAGCAGTTCAGTGACTATCACTCTGAGATGAACATGAGCGCC  
TTGCAGCTGGAGGACTCTGCTGTGTACTTCTGT

>BV\_TRBV1301\*01

GAGGCTGCAATCACCCAAAGCCCGAGAAGCAAGATGACAGTAACAGGAGGAAAGGTGGAA  
CTAAGCTGTAACCAGACAGACAACCACAATTATATGTACTGGTATCGGCAGGACCTGGGT  
CATGGACTGAGGCTGATCCATTACTCATTTGGTGCTGGCAGCACTGAGAACGGAGATGTC  
CCTGATGGGTACAAGGCCATTAGACCAAGCCAAGAGGAGTTCTCTCTCATTCTGGAGAAG  
GCTTCCCCCTCTCAGACAGCTGTGTACTTCTGT

>BV\_TRBV1301\*02

GAGGCTGCAATCACCCAAAGCCCGAGAAGCAAGATGACAGTAACAGGAGGAAAGGTGGAA  
CTAAGCTGTAACCAGACAGACAACCACAATTATATGTACTGGTATCGGCAGGACCTGGGT  
CATGGACTGAGGCTGATCCATTACTCATTTGGTGCTGGCAGCACTGAGAACGGAGATGTC  
CCTGATGGGTACAAGGCCATTAGACCAAGCCTAAAGGATTTCTCTCTCATTCTGGAGAAG  
GCTTCCCCCTCTCAGACAGCTGTGTACTTCTGT

>BV\_TRBV1301\*03

GAGGCTGCAATCACCCAAAGCCCGAGAAGCAAGATGACAGTAACAGGAGGAAAGGTGGAA  
CTAAGCTGTAACCAGACAGACAACCACAACATTATGTACTGGTATCGGCAGGACCTGGGT  
CATGGACTGAGGCTGATCCATTACTCATTTGGTGCTGGCAGCACTGAGAACGGAGATGTC  
CCTGATGGGTACAAGGCCATTAGACCAAGCCTAAAGGATTTCTCTCTCATTCTGGAGAAG  
GCTTCCCCCTCTCAGACAGCTGTGTACTTCTGT

>BV\_TRBV1302\*01

GAGGCTGCAGTCACCCAAAGCCCGAGAAACAAGGTGACAGTAACAGGAGGAAAGGTGGAA  
CTAAGCTGTCACCAGACGGACAACCACAACATTATGTACTGGTATCGGCAGGACCTGGGT  
CATGGACTGAGGCTGATCCATTACTCATATGGTGTATGGCAGCACTGAGAACGGAGATGTC  
CCTGATGGGTACAAGGCCACCAGACCGAAGACAGAGGAGTTCTCTCTCATTCTGGAGAAG  
GCTTCCCCCTCTCAGACAGCTGTGTACTTCTGT

>BV\_TRBV1302\*02

GAGGCTGCAGTCACCCAAAGCCCGAGAAACAAGGTGACAGTAACAGGAGGAAAGGTGGAA  
CTAAGCTGTCACCAGACGGACAACCACAACATTATGTACTGGTATCGGCAGGACCTGGGT  
CATGGACTGAGGCTGGTCCATTACTCATATGGTGTATGGCAGCACTGAGAACGGAGATGTC  
CCTGATGGGTACAAGGCCACCAGACCGAAGACAGAGGAGTTCTCTCTCATTCTGGAGAAG  
GCTTCCCCCTCTCAGACAGCTGTGTACTTCTGT

>BV\_TRBV1302\*03

GAGACTGCAGTCACCCAAAGCCCGAGAAACAAGGTGACAGTAACAGGAGGAAAGGTGGAA  
CTAAGCTGTCACCAGACGGACAACCACAACAATATGTACTGGTATCGGCAGGACCTGGGT  
CATGGACTGAGGCTGATCCATTACTCATATGGTGTATGGCAGCACTGAGAACGGAGATGTC  
CCTGATGGGTACAAGGCCACCAGACCGAAGACAGAGGAGTTCTCTCTCATTCTGGAGAAG  
GCTTCCCCCTTTCAGACATCTGTGTACTTCTGT

>BV\_TRBV1303\*01

GAGGCTGCAGTCACCCAAAGCCCAAGAAGCAAGGTGACAGTAACAGGAGGAAAGGTGGAA  
CTAAGCTGTAACCAGACGGACAACCACAACAATATGTACTGGTATCGTCAGGACCTGGGT  
CATGGACTGAGGCTGATCTATTACTCATATGGTGTGACAACATTCAAAAGGAGATGTC  
CCTGATGGGTACAAGGTCATCAGACCAAGGACAGAGGAGTTCTCTCTTATTCTGGAGAAG  
GCTTCCCCCTCTCAGACAGCTGTGTACTTCTGT

>BV\_TRBV1303\*02

GAGGCTGCAGTCACCCAAAGCCCAAGAAGCAAGGTGACAGTAACAGGAGGAAAGGTGGAA  
CTAAGCTGTCACCAGACGGACAACCACAACAATATGTACTGGTATCGTCAGGACTTGGGT  
CATGGACTGAGGCTGATCTATTACTCATATGGTGTGACAACATTCAAAAGGAGATGTC  
CCTGATGGGTACAAGGTCATCAGACCAAGGACAGAGGAGTTCTCTCTTATTCTGGAGAAG  
GCTTCCCCCTCTCAGACAGCTGTGTACTTCTGT

>BV\_TRBV1304\*01

GAGGCTGCAGTCACCCAAAGCCCAAGAAGCAAGGTGACAGTAACAGGAGGAAAGGTGGAA  
CTAAGCTGTCACCAGACTTTCAACCATGAAAATATGTACTGGTATCGGCAGGACCTGGGC  
CATGGACTGAGGCTGATCCATTACTCATATGTTGCTGGTAGCACTGAGAACGGAGATGTC  
CCTGATGGGTACAAGGCCACCAGACCAAGGACAGAGGAGTTCTCTCTCATTCTGGAGAAG  
GCTTCCCCCTCTCAGACATCTGTGTACTTCTGT

>BV\_TRBV1304\*02

GAGGCTGCAGTCACCCAAAGTCCAAGAAGCAAGGTGACAGTAACAGGAGGAAAGGTGGAA  
CTAAGCTGTAACCAGACTTTCAACCATGAAAATATGTACTGGTATCGGCAGGACCTGGGT  
CATGGACTGAGGCTGATCCATTACTCATATGGTGTGCTGGTAGCACTGAGAACGGAGATGTC  
CCTGATGGGTACAAGGCCACCAGACCAAGGACAGAGGAGTTCTCTCTCATTCTGGAGAAG  
GCTTCTCCTCTCAGACATCTGTGTACTTCTGT

>BV\_TRBV1304\*03

GAGGCTGCAGTCACCCAAAGCCCAAGAAGCAAGGTGACAGTAACAGGAGGAAAGGTGGAA  
CTAAGCTGTAACCAGACTTTCAACCATGAAAATATGTACTGGTATCGGCAGGACCTGGGT  
CATGGACTGAGGCTGATCCATTACTCATATGGTGTGCTGGTAGCACTGAGAACGGAGATGTC  
CCTGATGGGTACAAGGCCACCAGACCAAGGACAGAGGAGTTCTCTCTCATTCTGGAGAAG  
GCTTCTCCTCTCAGACATCTGTGTACTTCTGT

>BV\_TRBV1304\*04

GAGGCTGCAGTCACCCAAAGCCCAAGAAGCAAGGTGACAGTAACAGGAGGAAAGGTGGAA  
CTAAGCTGTAACCAGACTTTCAACCATGAAAATATGTACTGGTATCGGCAGGACCTGGGT  
CATGGACTGAGGCTGATCCATTACTCATATGGTACTGGTAGCACTGAGAACGGAGATGTC

CCTGATGGGTACAAGGCCACCAGACCAAGGACAGAGGAGTTCTCTCTCATTCTGGAGAAG  
GCTTCCCTCTCAGACATCTGTGTACTTCTGT

>BV\_TRBV1305\*01

GAGGCTGCAGTCACCCAAAGCCCAAAAAGCAAGGTGACAGTAACAGGAGGAAAGGTGGAA  
CTAAGCTGTAACCAGACTTTCAAACATGACAATATGTACTGGTATCGGCAGGACCTGGGT  
CATGCACTGAGGCTGATCTATTACTCATATGGTGTGACAGCATCGAGAAAGGAGATGTC  
CCTGATGGGTACAAGGTCACCAGACCAAGGACAGAGGAGTTCTCTCTCATTCTGGAGAAG  
GCTTCCCCCTCTCAGACAGCTGTGTACTTCTGT

>BV\_TRBV1305\*02

TACGCGGGAGTCACCCAAAGCCCAAAAAGCAAGGTGACAGTAACAGGAGGAAAGGTGGAA  
CTAAGCTGTAACCAGACTTTCAAACATGACAATATGTACTGGTATCGGCAGGACCTGGGT  
CATGCACTGAGGCTGATCTATTACTCATATGGTGTGACAGCATCGAGAAAGGAGATGTC  
CCTGATGGGTACAAGGTCACCAGACCAAGGACAGAGGAGTTCTCTCTCATTCTGGAGAAG  
GCTTCCCCCTCTCAGACAGCTGTGTACTTCTGT

>BV\_TRBV1305\*03

GAGGCTGCAGTCACCCAAAGCCCAAAAAGCAAGGTGACAGTAACAGGAGGAAAGGTGGAA  
CTAAGCTGTAACCAGACTTTCAAACATGACAATATGTACTGGTATTGGCAGGACCTGGGT  
CATGCACTGAGGCTGATCTATTACTCATATGGTGTGACAGCATCGAGAAAGGAGATGTC  
CCTGATGGGTACAAGGTCACCAGACCAAGGACAGAGGAGTTCTCTCTCATTCTGGAGAAG  
GCTTCCCCCTCTCAGACAGCTGTGTACTTCTGT

>BV\_TRBV1306\*01

GAGGCTGCAGTCACTCAAAGCCCAAGAAGCAAGGTGACAATAACAGGAGGAAAGGTGGAA  
CTAAGCTGTCACCAGACTGATGGCCATGACTATATGTACTGGTATCGGCAGGACCTGGGT  
CATGCACTGAGGCTGATCTATTACTCATATGGTGTGACAGCATCGAGAAAGGAGATGTC  
CCTGATGGGTACAAAGTCACCAGACCAAGGACAGAGGACTTCTCTCTCATTCTGGAGAAG  
GCTTCCCCCTCTCAGACAGCTGTGTACTTCTGT

>BV\_TRBV1307\*01

GAGGCTGCAGTCACCCAAAGCCCAAGAAGCAAGGTGACAGTAACAGGAGGAAAGGTGGAA  
CTAAGCTGTAACCAGACTTTCAACCATGGCAATATGTACTGGTATCGTCAGGACCTGGGT  
CATGGACTGAGGCTGATCTATTACTCATATGGTGTGACAACATTCAAAAGGAGATGTC  
CCTGATGGGTACAAGGTCATCAGACCAAGGACAGAGGACTTCTCTCTTATTCTGGAGAAG  
GCTTCCCCCTCTCAGACAGCTGTGTACTTCTGT

>BV\_TRBV14\*01

GAAGCTGGAGTCACTCAGTCTCCCAGATATGTGATCATAACAGGAAAGACAAGAAGTTTCC  
TTTTGGTGTGACCCTATTTCTGGACATAATACCCTTTACTGGTATCAGCAGCCCAGAGAC  
CAGGGCCTCCAGTTTCTAACTTACTTTCAGAATGAGGCTATTATGGATGATTACAACTG  
CCCAAGGATCGTTTTTCTGCAGTGC GGCCCAACGGAGTCAACTCTACTCTGAAGATCCAG  
TCTGCAAAGCTGGGGGACTCAGCCACATATCTCTGT

>BV\_TRBV14\*02

GAAGCTGGAGTCACTCAGTCTCCCAGATATGTGATCATAACGGAAAGACAAGAAGTTTCC  
TTTTGGTGTGACCCTATTTCTGGACATAATACCCTTTACTGGTATCAGCAGCCCAGAGAC  
CAGGGCCTCCAGTTTCTAACTTACTTTCAGAATGAGGCTATTATGGATGATTACAACTG  
CCCAAGGATCGTTTTTCTGCAGTGC GGCCCAACGGAGTCAACTCTACTCTGAAGATCCAG  
TCTGCAAAGCTGGGGGACTCAGCCACATATCTCTGT

>BV\_TRBV14\*03

GAAGCTGGAGTCACTCAGTCTCCCAGATATGTGATCATAACGGAAAGACAAGAAGTTTCC  
TTTTGGTGTGACCCTATTTCTGGACATACTACCCTTTACTGGTATCAGCAGCCCAGAGAC  
CAGGGCCTCCAGTTTCTAACTTACTTTCAGAATGAGGCTATTATGGATGATTACAACTG  
CCCAAGGATCGTTTTTCTGCAGTGC GGCCCAACGGAGTCAACTCTACTCTGAAGATCCAG  
TCTGCAAAGCTGGGGGACTCAGCCACATATCTCTGT

>BV\_TRBV14\*04

GAAGCTGGAGTCACTCAGTCTCCCAGATATGTGATCATAACGGAAAGACAAGAAGTTTCC



TTTTGGTGTGACCCTATTTCTGGACATAATACCCTTTACTGGTATCAGCAGTCCAGGGAC  
CAGGGCCTCCAGTTTCTAACTTACTTTTCAGAATGAGGCTATTATGGATGATTCACAACCTG  
CCCAAGGATCGTTTTTCTGCAGTGCGGCCTAACGGAGTCAACTCTACTCTGAAGATCCAG  
TCTGCAAAGCTGGGGGACTCAGCCACATATCTCTGT

>BV\_TRBV15\*01

GATGCTGGAGTTACCCAGTCACCCAGATATGAGGTGGCAGAGAAAGGACAAACAGTAACT  
CTGACTTGTGAACCAGTTTCAGGTCACAATGATCTTTTCTGGTACAGACAGACCAAGACA  
CAGGGACTAGAGTTGTTGAGGTACTTTCGCAGCAAGTCCCTTATGGAGGACGAAAAGACA  
GGAAAGGACAGATTACAGCTGAGATGCTAAATTCATCTGCCTCCACTCTGAAGATCCAG  
CCCACAGAACCCCAGGACTCAGCTGTGTATCTATGT

>BV\_TRBV15\*02

GATGCTGGAGTCACCCAGTCACCCAGACATGAGGTGGCAGAGAAAGGACAAACAGTAACT  
CTGACTTGTGAACCAGTTTCAGGTCACAATGATCTTTTCTGGTACAGACAGACCAAGACA  
CAGGGACTAGAGTTGCTGAGGTACTTTCGCAGCAAGTCCCTTATGGAGGACGAAAAGACA  
GGAAAGGACAGATTACAGCTGAGATGCTAAATTCATCTGCCTCCACTCTGAAGATCCAG  
CCCACAGAACCCCAGGACTCAGCTGTGTATCTATGT

>BV\_TRBV15\*03

GATGCTGGAGTCACCCAGTCACCCAGACATGAGGTGGCAGAGAAAGGTCAAACAGTAACT  
CTGACTTGTGAACCAGTTTCAGGTCACAATGATCTTTTCTGGTACAGACAGACCAAGACA  
CAGGGACTAGAGTTGCTGAGGTACTTTCGCAGCAAGTCCCTTATGGAGGACGACAAGACA  
GGAAAGAACAGATTACAGCTGAGATGCTAAATTCATCTGCCTCCACTCTGAAGATCCAG  
CCCACAGAACCCCAGGACTCAGCTGTGTATCTATGT

>BV\_TRBV16\*01

AATGCTGGGGTCACCCAAACACCCAGGCATAAGGTGACAGAGATGGGACAAGAAGTAACT  
CTGAGATGTGAACCAATTTTCAGGACACAGTGGTGTFTTTCTGGTACAGGCAGACGACTGTG  
CGGGGACTGGAATTTCTGATTTCTTTCTCAACCAGGCTCCTATAGGTGAAACAGGGATG  
CCCAAAGAACGTTTCTCAGCTCAGATGCCTAATGCGACGCTCTCCACTCTGAAGGTTGAG  
ACCACACAACCCCAGGACTCAGCTGTGTATCTCTGT

>BV\_TRBV16\*02

AATGCTGGGGTCACCCAAACACCCAGGCATAAGGTGACAGAGATGGGACAAGAAGTAACT  
CTGAGATGTGAACCAATTTTCAGGACACAGTGGTGTFTTTCTGGTACAGGCAGACGACTGTG  
CGGGGACTGGAATTTCTGATTTCTTTCTCAACCAGGCTCCTATAGGTGAAACAGGGATG  
CCCAAAGAACGTTTCTCAGCTCAGATGCCTAATGCGACACTCTCCACTCTGAAGGTTGAG  
ACCACACAACCCCAGGACTCAGCTGTGTATCTCTGT

>BV\_TRBV16\*03

AATGCTGGGGTCACCCAAACACCCAGGCATAAGGTGACAGAGATGGGACAAGAAGTAACT  
CTGAGATGTGAACCAATTTTCAGGACACAGTGGTGTFTTTCTGGTACAGGCAGACGACTGTG  
CGGGGACTGGAATTTCTGATTTCTTTCTCAACCAGGCTCCGATAGATGAAACAGGGATG  
CCCAAAGAACGTTTCTCAGCTCAGATGCCTAATGCGACGCTCTCCACTCTGAAGGTTGAG  
ACCACACAACCCCAGGACTCAGCTGTGTATCTCTGT

>BV\_TRBV16\*04

AATGCTGGGGTCACCCAAACACCCAGGCATAAGGTGACAAAGATGGGACAAGAAGTAACT  
CTGAGATGTGAACCAATTTTCAGGACACAGTGGTGTFTTTCTGGTACAGGCAGACGACTGTG  
CGGGGACTGGAATTTCTGATTTCTTTCTCAACCAGGCTCCTATAGGTGAAACAGGGATG  
CCCAAAGAACGTTTCTCAGCTCAGATGCCTAATGCGACGCTCTCCACTCTGAAGGTTGAG  
ACCACACAACCCCAGGACTCAACTGTGTATCTCTGT

>BV\_TRBV16\*05

AATGCTGGGGTCACCCAAACACCCAGGCATAAGGTGACAAAGATGGGACAAGAAGTAACT  
CTGAGATGTGAACCAATTTTCAGGACACAGTGGTGTFTTTCTGGTACAGGCAGACGACTGTG  
CGGGGACTGGAATTTCTGATTTCTTTCTCAACCAGGCTCCTATAGGTGAAACAGGGATG  
CCCAAAGAACGTTTCTCAGCTCAGATGCCTAATGTGACGCTCTCCACTCTGAAGGTTGAG  
ACCACACAACCCCAGGACTCAGCTGTGTATCTCTGT

>BV\_TRBV17\*01

GATGCGATGGTCATGCAAAACCCAAGATACAAGGTTTCCAGGGTTGGAAAACCAGTGAAT  
CTGAGCTGCTCCCAGAATCTGAATCATAATGCCATGTACTGGTACCAACAGAAACCAAAC  
CAAGCACCAAAGCTTCTGCTCTACTACTATGATACAACATTGAACAGGGAGTCTGACACT  
TCTGAAAACCTTCCAATCCAACCGGCCCAACACTTCTTTCTGCTCTCTTGGCATTCACTCT  
GCAGGCCTAGGGGATTCTTCCATGTACCTCTGT

>BV\_TRBV17\*02

GATGCGATGGTCATGCAAAACCCAAGATACAAGGTTTCCAGGGTTGGAAAACCAGTGAAT  
CTGAGCTGCTCCCAGAATTTGAATCATGATGTCATGTACTGGTACCAACAGAAACCAAAC  
CAAGCACCAAAGCTTCTGCTCTACTACTATGATACAACATTGAACAGAGAGGCTGACACT  
TCTGAAAACCTTCCAATCCAACCGGCCCAACACTTCTTTCTGCTCTCTTGGCATTCACTCT  
GCAGGCCTAGGAGATTCTTCCTTGTACCTCTGT

>BV\_TRBV17\*03

GATGCAATGGTCATGCAGAACCCAAGATACAAGGTTGCCAGGGTTGGAAAACCAGTGAAT  
CTGAGCTGCTCCCAGAATCTGAATCATAATGCCATGTACTGGTACCAACAGAAACCAAAC  
CAAGCACCAAAGCTTCTGCTCTACTACTATGATACAACATTGAACAGAGAGGCTGACACT  
TCTGAAAACCTTCCAATCCAACCGGCCCAACACTTCTTTCTGCTCTCTTGGCATTCACTCT  
GCAGGCCTAGGGGATTCTTCCATGTACCTCTGT

>BV\_TRBV19\*01

CACGGTGCCATCATTGAGAAACCCAAATTCCTGATCGGACTGCAAGGGCAGAAACTGACG  
ATGGAATGCCAACAGACTTTTTGATCACGATACCATGTACTGGTACCGGCAGGATCCAGGG  
AAAGGGTTGAGACAGATCTACTATTCAATAACTGAAAAAGATATCCAGAAAGGGGAAC  
TCTGAAGGCTATAGCGTCTCTCGTGAGAAAAAGCCGTTTTTCCCTCTTACTGTGACATCT  
GCCCAGAAGAACCAGATGGCTGTCTACCTCTGT

>BV\_TRBV19\*02

CACGGTGCCATCATTGAGAAACCCAAATTCCTGATCGGACTGCAAGGGCAGAAACTGACG  
ATGGAATGCCAACAGACTTTTTAATCACGATACCATGTACTGGTACCGGCAGGATCCAGGG  
AAAGGGTTGAGACAGATCTACTATTCAATAACTGAAAAAGATATCCAGAAAGGGGAAC  
TCTGAAGGCTATAGCGTCTCTCGTGAGAAAAAGCCGTTTTTCCCTCTTACTGTGACATCT  
GCCCAGAAGAACCAGATGGCTGTCTACCTCTGT

>BV\_TRBV19\*03

CACGGTGCCATCATTGAGAAACCCAAATTCCTGATCGGACTGCAAGGGCAGAAACTGACG  
ATGGAATGCCAACAGACTTTTTAATCACGATACCATGTACTGGTACCGGCAGGATCCAGGG  
AAAGGGTTGAGACAGATCTACTATTCAATAACTGAAAAAGATATCCAGAAAGGGGAAC  
TCTGAAGGCTATAGCGTCTCTCGTGAGAAAAAGCCGTTTTTCCCTCTTACTGTGACATCT  
GCCCAGAAGAACCAGATGGCTGTCTACTTCTGT

>BV\_TRBV19\*04

CACGGTGCCATCACTCAGAAACCCAAATTCCTGATCGGACTGCAAGGGCAGAAACTGACG  
ATGGAATGCCAACAGACTTTTTAATCACGATACCATGTACTGGTACCGGCAGGATCCAGGG  
AAAGGGTTGAGACAGATCTACTATTCAATAACTGAAAAAGATATCCAGAAAGGGGAAC  
TCTGAAGGCTATAGCGTCTCTCGTGAGAAAAAGCCGTTTTTCCCTCTTACTGTGACATCT  
GCCCAGAAGAACCAGATGGCTGTCTACCTCTGT

>BV\_TRBV19\*05

CACGGTGCCATCACTCAGAAACCCAAATTCCTGATCGGACTGCAAGGGCAGGAACTGACG  
ATGGAATGCCAACAGGGTTTTAATCACGATGCCATGTACTGGTACCGGCAGGATCCAGGG  
AAAGGGTTGAGACAGATCTACTATTCAATAGCTGAAAAAGATATCCAGAAAGGGGAAC  
TCTGAAGGCTATAGCGTCTCTCGAGAGAAAAAGCTGTTTTTCCCTCTTACTGTGACATCT  
GCCCAGAAGAACCAGATGGCTGTCTACCTCTGT

>BV\_TRBV20\*01

GGCGCTCTTGTGATCAATATCCCAGAAGGAGCATCTGTAGGACTGGAACCTCCATGAAG  
ATTGAGTGTCACTCTGTGGGTGTTGAGGCGACTAGTGTGGCTTGGTATCGCCAGTCCCCT  
CAAAGGGCCTTTGAACTGATGGCGATTTCTACTGTGAGCTCTACAGCCAAGTACGAACAA

AATTTTCCTGAGGACAAGTTTCCCATCAGTCATCCGAACTTAACCTTTTCATCTCTGACG  
GTTTCAAATGCATATCCTGAAGACGGGGCCTCTACATCTGT  
>BV\_TRBV20\*02  
GGTGCTCTTGTGCGATCAATATCCCAGAAGGAGCATCTGTAGGAGTGGAACCTCCATGAAG  
ATTGAGTGTCACTCTGTGGGTGTTTCAGGCGACTACTGTGGCTTGGTATCGCCAGTCCCCT  
CAAAGGGCCTTTGAACTGATGGCGATTTCTACTGTGAGCTCTACAGCCAAGTACGAACAA  
AATTTTCCTGAGGACAAGTTTCCCATCAGTCATCCGAACTTAACCTTTTCATCTCTGACG  
GTTTCAAATGCATATCCTGAAGACGGGGCCTCTACATCTGT  
>BV\_TRBV20\*03  
GGCGCTCTTGTGCGATCAATATCCCAGAAGGAGCATCTGTAGGACTGGAGCTTCCATGAAG  
ATTGAGTGTCACTCTGTGGGTGTTTCAGGCGACTAGTGTGGCTTGGTATCGCCAGTCCCCT  
CAAAGGGCCTTTGAACTGATGGCGATTTCTACTGTGAGCTCTACAGCCAAGTACGAACAA  
AATTTTCCTGAGGACAAGTTTCCCATTAGTCATCCGAACTTAACCTTTTCATCTCTGACG  
GTTTCAAATGCATATCCTGAAGACGGGGCCTCTACATCTGT  
>BV\_TRBV23\*01  
GATGCAGCAGTTACTCAGATTCCAAGACATCTGGTCAAATGAAAGGACAGAAAGCAACG  
ATGAAGTGTAGCCCTGAAAAGGGACACACTGCTGTTTACTGGTACCAGCAGAAGCAAGAC  
AAAGAGTTAAAGTTCCTGATTTACTTTCAGAATAAACAGCCTCTTGATCAAATAGACATG  
GTCAAGGAGCGATTCTCGGTTGAGTTTCACTCAGATACAGAGTGCAGTCTGGAAATCAA  
AGTTCGGAGGCAGGAGACTCTGCCCTGTACCTCTGT  
>BV\_TRBV23\*02  
GATGCAGCAGTTACTCAGATTCCAAGACATCTGGTCAAATGAAAGGACAGAAAGCAACG  
ATGAAGTGTAGCCCTGAAAAGGGACACACTGCTGTTTACTGGTACCAGCAGAAGCAAGAC  
AAAGAGTTAAAGTTCCTGATTTACTTTCAGAATAAACAGCCTCTTGATCAAATAGACATG  
GTCAAGGAGCGATTCTCGGTTGAGTTTCACTCAGATACAGAGTGCAGTCTGGAAATCAA  
AGTTCGGAGGCAGGAGACTCTGCCCTGTACCTCTGC  
>BV\_TRBV24\*01  
GATGCCAAAGTGACACAGACTCCTAGACATCTGGTCAAAGAGAAAGGACAGAAAGCAAAT  
ATGATTTGTTTTCCCCGAAAAGGGCACACTGCCTTTTACTGGTATCAGCAGAGCCAAAA  
GAACTTAAACTTTTGATTAACCTCCGGAATGAAGAAATATTGAACAAACAGACCTGGTC  
AAGAAGCGATTCTCGGCTAAGTGTCCCTCAGACTCACCTGCAGCCTGGAAATCCAGTCC  
TCTGAAGCGGGAGACACAGGGTTGTACTTCTGT  
>BV\_TRBV24\*02  
GATGCCAAAGTGACACAGACTCCTAGACATCTGGTCAAAGAGAAAGGACAGAAAGCAAAT  
ATGATTTGTTTTCCCCGAAAAGGGCACACTGCCTTTTACTGGTATCAGCAGAGCCAAAA  
GAACTTAAACTTTTGATTAACCTCCGGAATGAAGAAATATTGAACAAACAGACCTGGTC  
AAGAAGCGATTCTCAGCTAAGTGTCCCTCAGACTCACCTGCAGCCTGGAAATCCAGTCC  
TCTGAAGCGGGAGACACAGGGTTGTACTTCTGT  
>BV\_TRBV26\*01  
AATGCCAAAGTCATCCAGACTCCAAGATATCTGACCAAAGGGAAAGAACAGAAAGCAAAG  
ATGAGCTGTCGCCCTGAAAAGGGCCACGCTGTTGTGCTCTGGTATAAACAGAATAACAAC  
AATGAATTTACATTCTTGATTAGCTTTCAGAATCAAGACGTTCTTCAACAAATAGACATG  
GTCAAGAATCGATTCTCAGCTGAGTGTCCCTTCGAACTCACCTTGCAGCCTGGAAATCCAG  
TCCTCTGAGGCGGGAGACTCAGCACTGTACTTCTGT  
>BV\_TRBV26\*02  
AATGCCAAAGTCATCCAGACTCCAAGATATCTGACCAAAGGGAAAGAACAGAAAGCAAAG  
ATGAGCTGTCGCCCTGAAAAGGGCCACGCTGTTGTGCTCTGGTATAAACAGAATAACAAC  
AATGAATTTACATTCTTGATTAGCTTTCAGAATCAAGACGTTCTTCAACAAATAGACATG  
GTCAAGAATCGATTCTCAGCTGAGTGTCCCTTCGAACTCACCTTGCAGCCTGGAAATCCAG  
TCCTCCGAGGCGGGAGACTCAGCACTGTACTTCTGT  
>BV\_TRBV29\*01  
GACATGGACGTAACCCAGACACCAAGATATCTGGTCAAAGAACGGGAGAGGAAGTTTTG

CTGGACTGTGAACAGTATATGAGCCATGAAAGAATGTTCTGGTATCGACAAGACCCAGGT  
CTAGGGCTACGGTTGATTCATTTTTTCATATGATGTTGACAGTAACAGCGAAGGAGACATC  
CCTGAAGGATACAGGGTCTCTCGGAAGAAGCGGGAGCGTTTCTCCCTGATTCTGGAGTCT  
GCAAAAACCAGTCAGACATCTGTGTACTTCTGT

>BV\_TRBV29\*02

GACATGGACATAACCCAGACACCAAGATATCTGGTCAAAGAACGGGAGAGGAAGTTTTG  
CTGGACTGTGAACAGTATATGAGCCATGAAAGAATGTTCTGGTATCGACAAGACCCAGGT  
CTAGGGCTACGGTTGATTCATTTTTTCATATGATGTTAACAGTAACAGCGAAGGAGACATC  
CCTGAAGGATACAGGGTCTCTCGGAAGAAGCGGGAGCGTTTCTCCCTGATTCTGGAGTCT  
GCAAAAACCAGCCAGACATCTGTGTACTTCTGT

>BV\_TRBV30\*01

AGTGTCTCTCGTCTCCAAAAGCCCCAAAAGGGACATCTGTCAAAGTGGAACCTCGCTGAAA  
ATCCAGTGTGTGCTTGACAGTCAAGTTGCTGGGATGTTCTGGTACAGACAGATCCCGGGA  
CAGAGCTTGGTGCTCATGGCAGCTGCAAATCAAGGCTCAGAAGCCACATATGAGAAAAGAA  
TTCGACAAGGATAAGTTTCTATCAGCCGCCCAAACCTAACATTCTCCACGTTGACAGTG  
AGCAATGCGAGGCCTGAAGACAGCAGCTTCTATTTCTGC

>BV\_TRBV30\*02

AGTGTCTCTCGTCTCCAAAAGCCCCAAAAGGGCCATCTGTCAAAGTGGAACCTCGCTGAAA  
ATCCAGTGTGTGCTTGACAGTCAAGTTGCTGGGATGTTCTGGTACAGACAGATCCCGGGA  
CAGAGCTTGGTGCTCATGGCAGCTGCAAATCAAGGCTCAGAAGCCACATATGAGAAAAGAA  
TTCGACAAGGATAAGTTTCTATCAGCCGCCCAAACCTAACATTCTCCACATTGACAGTG  
AGCAATGCGAGGCCTGAAGACAGCAGCTTCTATTTCTGC

>BV\_TRBV30\*03

AGTGTCTCTCGTCTCCAAAAGCCCCAAAAGGGACATCTGTCAAAGTGGAACCTCGCTGAAA  
ATCCAGTGTGTGCTTGACAGTCAAGTTACAGGGATGTTCTGGTACAGACAGATCCCGGGA  
CAGAGCTTGGTGCTCATGGCAGCTGCAAATCAAGGCTCAGAAGCCACGTATGAGAAAAGAA  
TTCGACAAGGACAAGTTTCTATCAGCCGCCCAAACCTAACATTCTCCACGTTGACAGTG  
AGCAATGCGAGGCCTGAAGACAGCAGCTTCTATTTCTGC

>BV\_TRBV30\*04

AGTGTCTCTCGTCTCCAAAAGCCCCAAAAGGGACATCTGTCAAAGTGGAACCTCGCTGAAA  
ATCCAGTGTGTGCTTGACAGTCAAGTTGCTGGGATGTTCTGGTACAGGCAGATCCCGGGA  
CAGAGCTTGGTGCTCATGGCAGCTGCAAATCAAGGCTCAGAAGCCACGTATGAGAAAAGAA  
TCCGACAAGGATAAGTTTCTATCAGCCGCCCAAACCTAACATTCTCCACGTTGACAGTG  
AGCAATGCGAGGCCTGAAGACAGCAGCTTCTATTTCTGC

>BV\_TRBV31\*01

GCTCAGATTATCCACCAACAGCCAGCTGTCAGTGTGCAGCCTGTGGGCAGTTCACTCTCC  
GTGGAGTGTACCGTCCAGGGACAATCAAGCCCCAACCTCTACTGGTACTGGCAGGACAAA  
GGAGGGACCCTGCAGCAGCTCTTTTACTCTATTAGTGTTGGTGATGTGGTCTCGGTGGCA  
GCTCGGAACCTCTCGGCCTCCAGGCCCCAGGATGGCCAGTTCACCCTGAGCTCTGAGAAG  
CTGCTTCTCAGTCACTCTGGCTTCTACTTCTGT

>BV\_TRBV31\*02

GCTCAGATTATCCACCAACAGCCAGCTGTCAGTGTGCAGCCTGTGGGCAGTTCACTCTCT  
GTGGAGTGTACCGTCCAGGGACAATCAAGCCCCAACCTCTACTGGTACTGGCAGGACAAA  
GGAGGGACCCTGCAGCAGCTCTTTTACTCTATTAGTGTTGGTGATGTGGTCTCAGTGGCA  
GCTCGGAACCTCTCAGCCTCCAGGCCCCGGGATGGCCAGTTCATCCTGAGCTCTGAGAAG  
CTGTTTCTCAGTCACTCTGGCTTCTACTTCTGT

>BV\_TRBV31\*03

GCTCAGATTATCCACCAACAGCCAGCTGTCAGTGTGCAGCCTGTGGGCAGTTCACTCTCT  
GTGGAGTGTACCGTCCAGGGACAATCAAGCCCCAACCTCTACTGGTACTGGCAGGACAAA  
GGAGGGACCCTGCAGCAGCTCTTTTACTCTATTAGTGTTGGTGATGTGGTCTCAGTGGCA  
GCTCGGAACCTCTCAGCCTCCAGGCCCCGGGATGGCCAGTTCACCCTGAGCTCTGAGAAG  
CTGCTTCTCAGTCACTCTGGCTTCTACTTCTGT

>BV\_TRBV31\*04

GCTCAGATTATCCACCAACAGCCAGCTGTCTAGTGTGCAGCCTGTGGGCAGTTCACTCTCT  
GTGGAGTGTACCGTCCAGGGACAATCAAGCCCCAACCTCTACTGGTACTGGCAGGACAAA  
GGAGGGACCCTGCAGCAGCTCTTTTACTCTATTAGTGTGGTGTATGGTCTCAGTGGCA  
GCTCGGAACCTCTCAGCCTCCAGGCCCGGGATGGCCAGTTCATCCTGAGCTCTGAGAAG  
CTGCTTCTCAGTCACTCTGGCTTCTACTTCTGT

>BV\_TRBV40\*01

GAGGCTCAAGTCACCCAGGCTCCAAGACATCTTATCACAGAGACTGGGAAGAAGTTGATA  
ATAACTTGCTCCCAGAATATGAATCATGATTATATGTTCTGGTATAGACAAGACTCAGGC  
CTGGGTCTAAAGCTGATCTATTACTCAATTAATGCTGATCATGTGATAAAGGAGAAGTC  
TCTGATGGGTATAGTGTCTCTAGAGAAGACAAAAAAGCCTTTCTTCTGACACTGGAATCT  
ACCAGAGTCAGCCAGACCTCCTTGTACCTCTGT

>BV\_TRBV40\*02

GAGGCTCAAGTCACCCAGGCTCCAAGACATCTTATCACAGAGACTGGGAAGAAGTTGATA  
ATAACTTGCTCCCAGAATATGAATCATGATTATATGTTCTGGTATAGACAAGACTCAGGC  
CTGGGTCTAAAGCTGATCTATTACTCAATTAATGCTGATCATGTGATAAAGGAGAAGTC  
TCTGATGGGTATAGTGTCTCTAGAGAAGACAAAAAAGCCTTTCTTCTGACACTGGAATCT  
ACCAGAGTCAGCCAAACCTCCTTGTACCTCTGC

>BV\_TRBV40\*03

GAGGCTCAAGTCACCCAGGCTCCAAGACACCTCATCACAGAGACTGGGAAGAAGTTGATA  
ATAACTTGCTCCCAGAATATGAATCATGATTATATGTTCTGGTATAGACAAGACTCAGGC  
CTGGGTCTAAAGCTGATCTATTACTCAATTAATGCTGATCATGTGATAAAGGAGAAGTC  
TCTGATGGGTATAGTGTCTCTAGAGAAGACAAAAAAGCCTTTCTTCTGACACTGGAATCT  
ACCAGAGTCAGCCAAACCTCCTTGTACCTCTGC

>BV\_TRBV40\*04

GAGGCTCAAGTCACCCAGGCTCCAAGACACCTCATCACAGAGACTGGGAAGAAGTTGATA  
ATAACTTGCTCCCAGAATATGAATCATGATTATATGTTCTGGTATAGACAAGACTCAGGC  
CTGGGTCTAAAGCTGATCTATTACTCAATTAATGCTGATCATGTGATAAAGGAGAAGTC  
TCTGATGGGTATAGTGTCTCTAGAGAAGACAAAAAAGCCTTTCTTCTGACACTGGAATCT  
ACCAGAGTCAGCCAAACCTCCTTGTACCTCTGC

>BV\_TRBV40\*05

GAGGCTCAAGTCACCCAGGCTCCAAGACATCTTATCACAGAGACTGGGAAGAAGTTGATA  
ATAACTTGCTCCCAGAATATGAATCATGATTATATGTTCTGGTATAGACAAGACTCAGGC  
CTGGGTCTAAAGCTGATCTATTACTCAATTAATGCTGATCATGTGATAAAGGAGAAGTC  
TCTGATGGGTATAGTGTCTCTAGAGAAGACAAAAAAGCCTTTCTTCTGACACTGGAATCT  
ACCAGAGTCAGCCAAACCTCCTTGTACCTCTGT

>BV\_TRBV41\*01

AAGGCTGGAGTCTCCCAGTTTCCCGCTCACACTATCATCAAAAAGGGACAGAATGTATCT  
TTCAGGTGCGATCCAATTTTCAGGTCACACGCGCCTTTTCTGGTATCAGCAGAAATCGGGG  
CAAGGCCAGAGTTTCTGACTTATTTCCAGAATGAAGTCGCACCAGACAAATCAGGGCTG  
CCTGGAGATCGCTTCTCTGCAGAGAGGCCTGATGGATCCTACTCTGTTCTGAAGATCCAG  
CCTGCGAAGCGGGAGGACTCGGCGGTGTACCTCTGT

>BV\_TRBV41\*02

AAGGCTGGAGTCTCCCAGTTTCCCGCTCACACTATCATCAAAAAGGGACAGAATGTATCT  
TTCAGGTGCGATCCAATTTTCAGATCACACGCGCCTTTTCTGGTATCAGCAGAAATCGGGG  
CAAGGCCAGAGTTTCTGACTTATTTCCAGAATGAAGTCGCACCAGACAAATCAGGGCTG  
CCTGGAGATCGCTTCTCTGCAGAGAGGCCTGATGGATCCTACTCTGTTCTGAAGATCCAG  
CCTGCGAAGCAGGAGGACTCGGCGGTGTACCTCTGC

>BV\_TRBV41\*03

AAGGCTGGAGTCTCCCAGTTTCCCGCTCACACTATCATGAAAAGGGACAGAATGTATCT  
TTCAGGTGCGATCCAATTTTCAGGTCACCCGCACCTTTTCTGGTATCAGCAGAAATCGGGG  
CAAGGCCAGAGTTTCTGACTTATTTCCAGAATGAAGTCGCACCAGACAAATCAGGGCTG

CCTGGAGATCGCTTCTCTGCAGAGAGGCCTGATGGATCCTACTCTGTTCTGAAGATCCAG  
CCTGCGAAGCGGGAGGACTCGGCCGTGTACCTCTGC

>BV\_TRBV41\*04

AAGGCTGGAGTCTCCAGTTTCCCGCTCACACTATCATCAAAAAGGGACAGAATGTATCT  
TTCAGGTGCTATCCAATTTTCAGGTCACACCCGCCTTTTCTGGTATCAGCAGAAATCGGGG  
CAAGGCCAGAGTTTCTGACTTATTTCCAGAATGAAGTCACACCAGACAAATCAGGGCTG  
CCTGGAGATCGCTTCTCTGCAGAGAGGCCTGATGGATCCTACTCTGTTCTGAAGATCCAG  
CCTGCGAAGCGGGAGGACTCGGCCGTGTACCTCTGC

>BV\_TRBV41\*05

AAGGCTGGAGTCTCCAGTTTCCCGCTCACACTATCATCAAAAAGGGACAGAATGTATCT  
TTCAGGTGCTATCCAATTTTCAGGTCACACCCGCCTTTTCTGGTATCAGCAGAAATCGGGG  
CAAGGCCAGAGTTTCTGACTTATTTCCAGAATGAAGTCGCACCAGACAAATCAGGGCTG  
CCTGGAGATCGCTTCTCTGCAGAGAGGCCTGATGGATCCTACTCTGTTCTGAAGATCCAG  
CCTGCGAAGCGGGAGGACTCGGCCGTGTACCTCTGC

>BV\_TRBV42\*01

GATGGACAAGTTATCCAGATTCCAAAACATCTATTCAAAGGGAAAGGACAAAAGCAAAG  
ATGAGCTGTATCCCTGAAAACGGACATACTTATGTTTATTGGTACCAACAGAAGCAGAAT  
AAAGAGTTGAAATTTTGTATTTACTTTCAACGTCAAGAAGTTCGTGAAAGAATAGACTTT  
GTTAAGGAGCGATTTGTAGCTGAGTGTCCATAAACTCGCCCTGCAGCCTGGAAATCCAG  
TTCTCCGAGGCAGGAGACTCAGCACTGTACCTCTGT
